1 Choice of assembly software has a critical impact on virome characterisation.

2

3 Thomas D.S. Sutton\*<sup>1,2,#</sup>, Adam G. Clooney\*<sup>1,2</sup>, Feargal J. Ryan\*<sup>1,2,3</sup>, R. Paul Ross<sup>1,2,4</sup>,

4 Colin Hill<sup>1,2</sup>

5 \* Authors contributed equally

6 # Corresponding author, t.sutton@umail.ucc.ie

7 1. APC Microbiome Ireland, Cork, Ireland

8 2. School for Microbiology, University College Cork

9 3. (Current location) South Australian Health and Medical Research Institute, Adelaide,  
10 Australia.

11 4. Teagasc Food Research Centre, Fermoy, Cork, Ireland

12

### 13 **Abstract**

#### 14 *Background*

15 The viral component of microbial communities play a vital role in driving bacterial diversity,  
16 facilitating nutrient turnover and shaping community composition. Despite their importance, the vast  
17 majority of viral sequences are poorly annotated and share little or no homology to reference  
18 databases. As a result, investigation of the viral metagenome (virome) relies heavily on *de novo*  
19 assembly of short sequencing reads to recover compositional and functional information.

20 Metagenomic assembly is particularly challenging for virome data, often resulting in fragmented  
21 assemblies and poor recovery of viral community members. Despite the essential role of assembly in  
22 virome analysis and difficulties posed by these data, current assembly comparisons have been limited  
23 to subsections of virome studies or bacterial datasets.

24 *Design*

25 This study presents the most comprehensive virome assembly comparison to date, featuring 16  
26 metagenomic assembly approaches which have featured in human virome studies. Assemblers were  
27 assessed using four independent virome datasets, namely; simulated reads, two mock communities,  
28 viromes spiked with a known phage and human gut viromes.

29 *Results*

30 Assembly performance varied significantly across all test datasets, with SPAdes (meta) performing  
31 consistently well. Performance of MIRA and VICUNA varied, highlighting the importance of using a  
32 range of datasets when comparing assembly programs. It was also found that while some assemblers  
33 addressed the challenges of virome data better than others, all assemblers had limitations. Low read  
34 coverage and genomic repeats resulted in assemblies with poor genome recovery, high degrees of  
35 fragmentation and low accuracy contigs across all assemblers. These limitations must be considered  
36 when setting thresholds for downstream analysis and when drawing conclusions from virome data.

37 **Keywords**

38 Virome, viral, assembly, metagenome, benchmark, comparison, bacteriophage, phage

39

## 40 **Background**

41 The rapid evolution of metagenomics and high throughput sequencing technologies has revolutionised  
42 the study of microbial communities, giving new insights into the role and identity of the uncultivated  
43 microbes which account for the majority of metagenomic sequences (Solden, Lloyd et al. 2016).  
44 However, the majority of microbial sequencing efforts have focused on the characterisation of  
45 prokaryotic microbes. Viral metagenomes (viromes) are dominated by novel sequences, often with up  
46 to 90% of sequences sharing little to no homology to reference databases (Aggarwala, Liang et al.  
47 2017). Bacteriophage, the most abundant members of viral communities, play a key role in the  
48 shaping the composition of microbial communities and facilitate horizontal gene transfer (Paul 2008).  
49 Viromes have been shown to play a role in global geochemical cycles (Breitbart 2011) and have been  
50 studied in varied ecosystems including the ocean (Hurwitz and Sullivan 2013). Viromes of the human  
51 body are of particular interest, where they have been linked to disease status (Norman, Handley et al.  
52 2015), maintaining human health (Manrique, Bolduc et al. 2016) and shaping the gut microbiome in  
53 early life (Lim, Zhou et al. 2015, McCann, Ryan et al. 2018). Due to the predominance of  
54 uncharacterised viral sequences “viral dark matter”; (Roux, Hallam et al. 2015), and the lack of a  
55 universal marker gene, virome studies rely on database independent analysis methods and depend  
56 heavily on *de novo* assembly to resolve viral genomes from metagenomic sequencing reads.

57 Metagenomic assemblers typically use de Bruijn graph (DBG) approaches to address the  
58 complexity and size of metagenomic datasets in an accurate and efficient manner. Microbial  
59 metagenomes pose significant challenges to DBG assembly when compared to single genome  
60 assemblies often complicating the DBG and leading to fragmentation and/or misassembly (Olson,  
61 Treangen et al. 2017). These challenges include uneven sequencing coverage of organisms within the  
62 metagenome, the presence of conserved regions across different species, repeat regions within  
63 genomes and the introduction of false *k*-mers by both closely related genomes at differing abundances  
64 and sequencing errors at high read coverage. This hampers the use of coverage statistics to resolve  
65 repeat regions between and within genomes (Olson, Treangen et al. 2017).

66           A wide array of metagenomic assembly programs have been employed, each addressing  
67 aspects of metagenomic challenges to varying degrees. However, many of these programs have been  
68 designed and optimised for bacterial metagenomes, which share many assembly challenges of  
69 viromes but to a lesser degree. Virome data is characterised by high proportions of repeat regions  
70 within viral genomes (Minot, Grunberg et al. 2012), hypervariable genomic regions associated with  
71 host interaction (Warwick-Dugdale, Solonenko et al. 2018) and high mutation rates which lead to  
72 increased metagenomic complexity and strain variation (Roux, Emerson et al. 2017). Low DNA  
73 yields also limit read coverage and often require a multiple displacement amplification (MDA) step  
74 which has been shown to preferentially amplify small single stranded DNA viruses (Kim and Bae  
75 2011). Extremes in read coverage caused by MDA bias and dominant viral taxa such as crAssphage,  
76 which can make up large proportions of human gut viromes (Dutilh, Cassman et al. 2014), sequester  
77 sequencing resources and result in insufficient coverage of low abundance viruses. These challenges  
78 result in fragmented virome assemblies (García-López, Vázquez-Castellanos et al. 2015), limiting  
79 their use in downstream analysis. Despite benchmarks of bacterial metagenomes having highlighted  
80 failings and benefits of particular assembly programs, many poorly performing assemblers have  
81 featured in virome studies (Foulongne, Sauvage et al. 2012, Hannigan, Meisel et al. 2015, Guo, Hua et  
82 al. 2017).

83           Accurate comparison of metagenomic assemblers is complicated by the unknown  
84 composition of metagenomic datasets and the limited applicability of general assembly statistics such  
85 as N50 (Deng, Naccache et al. 2015, Vollmers, Wiegand et al. 2017). To address this, the accuracy  
86 and efficacy of metagenomic assembly programs is often evaluated using simulated datasets and  
87 mock communities of known composition. Although these simulated datasets are undergoing constant  
88 improvements (Sczyrba, Hofmann et al. 2017, Fritz, Hofmann et al. 2018), they have focused  
89 primarily on bacterial metagenomes and remain limited in their ability to accurately replicate the  
90 challenges of true metagenomes. While some virome-specific assembly benchmarks have been  
91 performed, many have been limited to a small number of assemblers, 454 data or subsections of  
92 virome studies and have exclusively used simulated data (Aguirre de Cárcer, Angly et al. 2014, Smits,

93 Bodewes et al. 2014, Vázquez-Castellanos, García-López et al. 2014, García-López, Vázquez-  
 94 Castellanos et al. 2015, Hesse, van Heusden et al. 2017, Roux, Emerson et al. 2017).

95 Here we expand upon previous studies and present a detailed investigation of assembly  
 96 software for virome analysis which compares all those previously used in human virome studies to  
 97 date, as well as other popular or more recently published assemblers (Table 1). We compare assembly  
 98 efficacy and accuracy using simulated viromes, mock viral communities and human gut viromes  
 99 spiked with a known exogenous bacteriophage. Furthermore we confirm these findings using human  
 100 virome data from published datasets and assess computational parameters such as runtime and RAM  
 101 usage. We also investigate in detail the impact of sequencing coverage and genomic repeats on  
 102 assembly performance and highlight important considerations for future virome studies. Together  
 103 these data comprise most comprehensive virome assembly benchmark to date.

|                                 | Link                                                                                                                                            | Version used | Reference                                                                                 |
|---------------------------------|-------------------------------------------------------------------------------------------------------------------------------------------------|--------------|-------------------------------------------------------------------------------------------|
| <b>ABySS (<i>k</i>-mer 63)</b>  | <a href="http://www.bcgsc.ca/downloads/abyss/">http://www.bcgsc.ca/downloads/abyss/</a>                                                         | v2.0.2       | (Simpson, Wong et al. 2009)                                                               |
| <b>ABySS (<i>k</i>-mer 127)</b> | <a href="http://www.bcgsc.ca/downloads/abyss/">http://www.bcgsc.ca/downloads/abyss/</a>                                                         | v2.0.2       | (Simpson, Wong et al. 2009)                                                               |
| <b>CLC</b>                      | <a href="https://www.qiagenbioinformatics.com/products/clc-assembly-cell/">https://www.qiagenbioinformatics.com/products/clc-assembly-cell/</a> | v5.0.5       | <a href="https://www.qiagenbioinformatics.com/">https://www.qiagenbioinformatics.com/</a> |
| <b>Geneious</b>                 | <a href="https://www.geneious.com/features/assembly-mapping/">https://www.geneious.com/features/assembly-mapping/</a>                           |              | (Kearse, Moir et al. 2012)                                                                |
| <b>IDBA UD</b>                  | <a href="https://i.cs.hku.hk/~alse/hkubrg/projects/idba_ud">https://i.cs.hku.hk/~alse/hkubrg/projects/idba_ud</a>                               | v1.1.1       | (Peng, Leung et al. 2012)                                                                 |
| <b>MEGAHIT</b>                  | <a href="https://github.com/voutcn/megahit">https://github.com/voutcn/megahit</a>                                                               | V1.1.1-2     | (Li, Luo et al. 2016)                                                                     |
| <b>MetaVelvet</b>               | <a href="https://metavelvet.dna.bio.keio.ac.jp/">https://metavelvet.dna.bio.keio.ac.jp/</a>                                                     | V1.2.0<br>2  | (Namiki, Hachiya et al. 2012)                                                             |
| <b>MIRA</b>                     | <a href="http://www.chevreux.org/mira_downloads.html">http://www.chevreux.org/mira_downloads.html</a>                                           | V4.0.2       | (García-López, Vázquez-Castellanos et al. 2015)                                           |
| <b>Ray Meta</b>                 | <a href="http://denovoassembler.sourceforge.net/">http://denovoassembler.sourceforge.net/</a>                                                   | V2.3.0       | (Boisvert, Raymond et al. 2012)                                                           |
| <b>SOAPdenovo 2</b>             | <a href="http://soap.genomics.org.cn/soapdenovo.html">http://soap.genomics.org.cn/soapdenovo.html</a>                                           | v2.04        | (Luo, Liu et al. 2012)                                                                    |
| <b>SPAdes</b>                   | <a href="http://cab.spbu.ru/software/spades/">http://cab.spbu.ru/software/spades/</a>                                                           | V3.10.<br>0  | (Bankevich, Nurk et al. 2012)                                                             |
| <b>SPAdes meta</b>              | <a href="http://cab.spbu.ru/software/spades/">http://cab.spbu.ru/software/spades/</a> (variation of SPAdes applied with flag)                   | V3.10.<br>0  | (Nurk, Meleshko et al. 2017)                                                              |
| <b>SPAdes sc</b>                | <a href="http://cab.spbu.ru/software/spades/">http://cab.spbu.ru/software/spades/</a> (variation of SPAdes applied with flag)                   | V3.10.<br>0  | (Bankevich, Nurk et al. 2012)                                                             |
| <b>SPAdes sc careful</b>        | <a href="http://cab.spbu.ru/software/spades/">http://cab.spbu.ru/software/spades/</a> (variation of SPAdes applied with flag)                   | V3.10.<br>0  | (Bankevich, Nurk et al. 2012)                                                             |
| <b>Velvet</b>                   | <a href="https://www.ebi.ac.uk/~zerbino/velvet/">https://www.ebi.ac.uk/~zerbino/velvet/</a>                                                     | V1.2.1<br>0  | (Zerbino and Birney 2008)                                                                 |
| <b>VICUNA</b>                   | <a href="https://github.com/broadinstitute/mvicuna">https://github.com/broadinstitute/mvicuna</a>                                               | V1.3         | (Vázquez-Castellanos, García-López et al. 2014)                                           |

104 *Table 1: A list of assemblers used in this study*

## 105 **Results**

### 106 *Simulated virome dataset*

107 The ability to accurately recover each of the 572 members of a published simulated community  
108 (Hesse, van Heusden et al. 2017) and the degree of fragmentation, was assessed by aligning the  
109 resulting contigs from each assembler to the reference genomes (Fig. 1). MetaVelvet was not included  
110 in this analysis as it failed to reach completion after seven days. Approximately half of the genomes in  
111 the community featured an average recovered genome fraction less than 75% and exhibited higher  
112 degrees of fragmentation (>10 contigs per genome on average) across all assemblers. For 87 of the  
113 572 genomes there was an average recovered genome fraction of less than 20% across all assemblers  
114 (the low recovered genome fraction of VICUNA was excluded as an outlier). Of these genomes, 84  
115 were present at low abundance (lowest 40% of all abundances normalised to genome length). The  
116 remaining three genomes were present at higher normalised abundances (50 – 80<sup>th</sup> percentile) but  
117 featured the some of the highest proportions of genomic repeats (70<sup>th</sup>-90<sup>th</sup> percentile).

118 Normalised genome abundance within the community had a strong positive correlation with  
119 recovered genome fraction across all assemblers (Supplementary Table 1, Additional file 5) and was  
120 verified using a linear model (Supplementary Table 2, Additional file 5), with the exception of  
121 SOAPdenovo2, which was negative. Normalised abundance also correlated negatively with the  
122 degree of fragmentation (number of contigs) across all assemblers except Velvet which was positively  
123 correlated and Geneious which was not significant (Supplementary Table1, Additional file 5). None  
124 of the genomes in the lower 30<sup>th</sup> percentile of normalised abundance featured an average recovered  
125 genome fraction greater than 75%, further exemplifying the impact of low sequencing coverage.  
126 However high abundance did not consistently improve genome recovery and of the 172 genomes in  
127 the top 30% of normalised abundance, 20 featured an average genome fraction below 50%. The  
128 distance of the log transformed (due to extremes in values) normalised abundances from the mean was  
129 negatively correlated with recovered genome fraction across all assemblers (correlation coefficient: -  
130 0.42, p-value < 2.2e<sup>-16</sup>). Of 171 genomes in the 40<sup>th</sup> – 60<sup>th</sup> percentile of normalised abundance 29  
131 featured an average genome fraction below 50%. This indicates factors other than abundance may

132 hamper genome recovery. MIRA and Geneious both recovered a greater fraction of low abundance  
133 genomes with fewer contigs than other assemblers. However, MIRA assemblies of 13 of the most  
134 abundant genomes in the community (highest 10%) exhibited the highest degree of fragmentation in  
135 the study, generating between 401 and 2983 contigs per genome.

136 The proportion of inverted repeats, palindromic repeats, tandem repeats and a total proportion  
137 of genomic repeats was calculated for each genome. The total percentage of repeat regions predicted  
138 in each genome was positively correlated with the degree of fragmentation observed in each assembly  
139 across all assemblers with the exception of Ray Meta (Supplementary Table 3, Additional file 5), and  
140 negatively correlated with recovered genome fraction across all assemblers except ABySS ( $k$ -mer  
141 63/127), Geneious, and SOAPdenovo2. When this relationship between repeat regions and the  
142 recovered genome fraction was assessed using a linear model, correlations were significant for CLC,  
143 MIRA, Ray Meta, Velvet, and all parameters of SPAdes (Supplementary Table 2, Additional file 5).  
144 Both the proportion of repeat regions in a genome and the relative abundance of that genome  
145 contribute to the variation in recovered genome fraction, though each explain a separate aspect of this  
146 variation. No interaction was found between these two metrics.

147 VICUNA, Ray Meta, SOAPdenovo2, Geneious, ABySS (both  $k$ -mer sizes) and Velvet  
148 recovered under 50% of the total genome fraction (all genomes in the community). VICUNA  
149 produced just four contigs in total with high levels of mismatches (174 per 100kb on average) which  
150 could possibly linked to the format of the artificial reads as this was not observed in real sequencing  
151 data. The five assemblers which recovered the highest genome fraction overall were SPAdes  
152 (default), MEGAHIT, SPAdes (single cell), SPAdes (single cell + careful) and CLC. All assemblers  
153 achieving a minimum average genome fraction of 50% were subjected to a ranking system  
154 (Supplementary Table 4, Additional file 5). To compare both recovery and fragmentation assemblers  
155 were ordered from best to worst based on genome recovery and number of aligned contigs. The  
156 average rank resulted in Spades (default) performing best, recovering 72.2% overall genome  
157 sequences with 8230 contigs. The remaining top five assemblers of this combined rank were SPAdes  
158 (meta) 68.2% with 7419 contigs, SPAdes (single cell) 68.9% with 9506 contigs, CLC 68.6% with

159 9152 contigs and MEGAHIT 69.6% with 10083 contigs. The number of assemblies which recovered  
 160 greater than 90% of the target genome in one single contig was compared (Fig 2). SPAdes (default)  
 161 performed best, recovering 210, SPAdes (meta), SPAdes (single cell + careful), CLC, and SPAdes  
 162 (single cell) each recovered 179, 168, 162 and 160 genomes respectively.

163 The accuracy of assemblies was assessed by calculating the average count of indels,  
 164 mismatches, and misassemblies per 100kb across all genomes. These counts were normalised to the  
 165 number of genomes each assembler recovered with a minimum genome fraction of 50%. These were  
 166 ranked according to their performance in all three metrics (Supplementary Table 4, Additional file 5),  
 167 with assemblies from Velvet having the lowest overall counts followed by ABySS, IDBA UD,  
 168 MEGAHIT and Ray Meta. With the exception of Ray Meta and SOAPdenovo2, the number of  
 169 mismatches per 100kb was negatively correlated with both genome abundance and recovered genome  
 170 fraction across all assemblers (Supplementary Table 1, Additional file 5).

171 The rate of false positive (no alignment to reference genomes) and false negative (recovered  
 172 genome fraction of 0%) contigs assembled allowed for the determination of sensitivity. A number of  
 173 assemblers had a sensitivity greater than 97%, however each returned greater than 7,000 contigs,  
 174 inferring a high degree of fragmentation (Table 2). MIRA assembled (partial or complete) 559 of the  
 175 genomes with a false positive count of just four. However, this was achieved from more than 27,000  
 176 contigs. ABySS (both *k*-mer sizes), Geneious, Ray Meta and Velvet returned very few false positives  
 177 but failed to detect many of the genomes present. SPAdes (meta) performed best with 558 of the 572  
 178 genomes detected and only five false positives resulting from 7419 contigs.

|                                     | <b>False<br/>Positives</b> | <b>False<br/>Negative</b> | <b>True<br/>Positives</b> | <b>No. of contigs<br/>returned*</b> | <b>Sensitivity</b> |
|-------------------------------------|----------------------------|---------------------------|---------------------------|-------------------------------------|--------------------|
| <b>ABSS (<i>k</i>-mer 63)</b>       | 0                          | 111                       | 461                       | 7957                                | 80.59              |
| <b>ABySS (<i>k</i>-mer<br/>127)</b> | 1                          | 123                       | 449                       | 7732                                | 78.50              |
| <b>CLC</b>                          | 34                         | 5                         | 567                       | 9152                                | 99.13              |
| <b>Geneious</b>                     | 9                          | 190                       | 382                       | 958                                 | 66.78              |
| <b>IDBA UD</b>                      | 25                         | 9                         | 563                       | 8999                                | 98.43              |
| <b>MEGAHIT</b>                      | 21                         | 8                         | 564                       | 10083                               | 98.60              |
| <b>MetaVelvet</b>                   | N/A                        | N/A                       | N/A                       | N/A                                 | N/A                |
| <b>MIRA</b>                         | 4                          | 13                        | 559                       | 27600                               | 97.73              |



|                          |     |     |     |                   |       |
|--------------------------|-----|-----|-----|-------------------|-------|
| <b>Ray Meta</b>          | 0   | 213 | 359 | 4224              | 62.76 |
| <b>SOAPdenovo2</b>       | 536 | 116 | 456 | 11548             | 79.72 |
| <b>SPAdes</b>            | 29  | 3   | 569 | 8230              | 99.48 |
| <b>SPAdes meta</b>       | 5   | 14  | 558 | 7419              | 97.55 |
| <b>SPAdes sc</b>         | 38  | 7   | 565 | 9506              | 98.78 |
| <b>SPAdes sc careful</b> | 40  | 6   | 566 | 9724              | 98.95 |
| <b>Velvet</b>            | 1   | 65  | 507 | 6343              | 88.64 |
| <b>VICUNA</b>            | 0   | 558 | 14  | 4                 | 2.45  |
|                          |     |     |     | *572 in community |       |

179 *Table 2: The number of false positive, false negative contigs generated by each assembler for the*

180 *Simulated community, together with the sensitivity rates*

181

182 *Mock community dataset*

183 Two mock viral communities were used to investigate the impact of high and low abundance ssDNA

184 viruses on assembly performance. Mock A (Table 3a) contained 12 viral genomes, 10 of which were

185 at equal abundance (9.82% of the total community) and two ssDNA genomes (NC\_001330 and

186 NC\_001422) at low abundance (0.92%). Analysis of this community showed that although some

187 assemblers, namely CLC, Geneious, SPAdes (single cell) and VICUNA, detected all 12 genomes, this

188 was at the expense of a large number of false positives (1143, 53, 1513 and 4969 respectively). Velvet

189 and MetaVelvet generated no false positives, but failed to assemble three genomes, while ABySS (for

190 both *k*-mers) generated a large number of false positives and failed to assemble four and six genomes,

191 respectively. IDBA UD and Ray Meta outperformed the other assemblers with an equal number of

192 contigs to genomes (12), followed by MEGAHT, SPAdes (default) and SPAdes (meta) with 13, 14

193 and 14. Mock B (Table 3b) also contained 12 genomes but with a higher abundance of ssDNA

194 genomes NC\_001330 and NC\_001422 (32.47%). VICUNA assemblies of Mock B improved upon

195 those from Mock A as no false positives were generated, while the false positive rate in the MIRA

196 assembler increased to 94 from none in Mock A. IDBA UD performed best followed by SPAdes

197 (default), Ray Meta, MEGAHT and SPAdes (meta) based on sensitivity and number of contigs, while

198 ABySS (both *k*-mer sizes) and SOAPdenovo2 had the lowest sensitivity. Despite being a relatively

199 simple community consisting of 12 members, not all assemblers were able to recover all members

200 (Supplementary Table 5-6, Additional file 5). A greater number of assemblers (six) failed to assemble  
 201 all members of Mock B than Mock A (four). ABySS(*k*-mer 63), ABySS(*k*-mer 127), Velvet and  
 202 MetaVelvet failed to assemble 6, 4, 3 and 3 genomes respectively, in Mock A and 6, 4, 1 and 1  
 203 genomes, respectively in Mock B. In addition, MIRA and SOAPdenovo2 failed to assemble 1 and 2  
 204 genomes respectively in Mock B.

A)

|                                 | False Positives | False Negative | True Positive | No. of contigs returned* | Sensitivity |
|---------------------------------|-----------------|----------------|---------------|--------------------------|-------------|
| <b>ABySS (<i>k</i>-mer 63)</b>  | 52              | 4              | 8             | 61                       | 66.67       |
| <b>ABySS (<i>k</i>-mer 127)</b> | 50              | 6              | 6             | 56                       | 50.00       |
| <b>CLC</b>                      | 1143            | 0              | 12            | 1299                     | 100.00      |
| <b>Geneious</b>                 | 53              | 0              | 12            | 65                       | 100.00      |
| <b>IDBA UD</b>                  | 0               | 0              | 12            | 12                       | 100.00      |
| <b>MEGAHIT</b>                  | 0               | 0              | 12            | 13                       | 100.00      |
| <b>MetaVelvet</b>               | 0               | 3              | 9             | 26                       | 75.00       |
| <b>MIRA</b>                     | 0               | 0              | 12            | 89                       | 100.00      |
| <b>Ray Meta</b>                 | 0               | 0              | 12            | 12                       | 100.00      |
| <b>SOAPdenovo2</b>              | 2               | 0              | 12            | 23                       | 100.00      |
| <b>SPAdes</b>                   | 0               | 0              | 12            | 14                       | 100.00      |
| <b>SPAdes meta</b>              | 0               | 0              | 12            | 14                       | 100.00      |
| <b>SPAdes sc</b>                | 1513            | 0              | 12            | 1527                     | 100.00      |
| <b>SPAdes sc careful</b>        | 0               | 0              | 12            | 15                       | 100.00      |
| <b>Velvet</b>                   | 0               | 3              | 9             | 26                       | 75.00       |
| <b>VICUNA</b>                   | 4969            | 0              | 12            | 5385                     | 100.00      |
|                                 |                 |                |               | *12 in community         |             |

205

B)

|                                 | False Positives | False Negative | True Positives | No. of contigs returned* | Sensitivity |
|---------------------------------|-----------------|----------------|----------------|--------------------------|-------------|
| <b>ABySS (<i>k</i>-mer 63)</b>  | 60              | 4              | 8              | 69                       | 66.67       |
| <b>ABySS (<i>k</i>-mer 127)</b> | 132             | 6              | 6              | 139                      | 50.00       |
| <b>CLC</b>                      | 450             | 0              | 12             | 505                      | 100.00      |
| <b>Geneious</b>                 | 14              | 0              | 12             | 30                       | 100.00      |
| <b>IDBA UD</b>                  | 0               | 0              | 12             | 12                       | 100.00      |
| <b>MEGAHIT</b>                  | 0               | 0              | 12             | 14                       | 100.00      |
| <b>MetaVelvet</b>               | 0               | 1              | 11             | 24                       | 91.67       |
| <b>MIRA</b>                     | 94              | 1              | 11             | 157                      | 91.67       |
| <b>Ray Meta</b>                 | 0               | 0              | 12             | 13                       | 100.00      |
| <b>SOAPdenovo2</b>              | 2               | 2              | 10             | 27                       | 83.33       |

|                          |     |   |    |                  |        |
|--------------------------|-----|---|----|------------------|--------|
| <b>SPAdes</b>            | 0   | 0 | 12 | 13               | 100.00 |
| <b>SPAdes meta</b>       | 0   | 0 | 12 | 14               | 100.00 |
| <b>SPAdes sc</b>         | 593 | 0 | 12 | 607              | 100.00 |
| <b>SPAdes sc careful</b> | 0   | 0 | 12 | 14               | 100.00 |
| <b>Velvet</b>            | 0   | 1 | 11 | 24               | 91.67  |
| <b>VICUNA</b>            | 0   | 0 | 12 | 15               | 100.00 |
|                          |     |   |    | *12 in community |        |

206 *Table 3: The number of false positive, false negative contigs generated by each assembler for a) Mock*  
207 *community A and b) Mock community B) along with the sensitivity rates for each*

208 All but three VICUNA assemblies in Mock A exhibited a high level of fragmentation,  
209 generating  $34.7 \pm 35$  (mean  $\pm$  standard deviation) contigs per genome. Fragmentation was also seen in  
210 MIRA assemblies to a lesser degree with  $7.4 \pm 10$  (mean  $\pm$  standard deviation) contigs per genome on  
211 average. There was a high rate of fragmentation in CLC with one community member generating 144  
212 contigs for genome KF302035. Average recovered genome fraction of  $85.4 \pm 6.4\%$  was skewed by  
213 ABySS ( $k$ -mer 63), ABySS ( $k$ -mer 127), Velvet, MetaVelvet, SOAPdenovo2, and VICUNA which  
214 recovered on average 49.5%, 66.6%, 73.8%, 73.8%, 29.7% and 76.6%, respectively. All other  
215 assemblers recovered over 99% of each genome in the community (Supplementary Figure 1,  
216 Additional file 6).

217 Closer inspection of the two ssDNA genomes present at lower relative abundance highlighted  
218 significant differences in the average number of indels across all assemblies of the NC\_001330 and  
219 NC\_001422 genomes versus other members of the community ( $p$ -value = 0.037). These genomes  
220 exhibited an average of  $41.7 \pm 18.5$  and  $9.4 \pm 20.4$  indels per 100kb, while all other genomes featured  
221 an average of  $7.8 \pm 18.9$  indels per 100kb. The low abundant ssDNA genomes NC\_001330 and  
222 NC\_001422 also featured the highest average mismatches per 100kb at  $148.7 \pm 3$  and  $302.5 \pm 10.7$ ,  
223 respectively (Supplementary Figure 1, Additional file 6).

224 The degree of fragmentation observed by VICUNA and MIRA in Mock B was lower than in Mock A  
225 with a mean of  $1.3 \pm 0.89$  and  $5.3 \pm 7.7$  contigs per genome, respectively. CLC fragmented genome  
226 KF302035 in Mock B (44 contigs), but to a lesser degree than Mock A (144 contigs). MEGAHIT,  
227 which recovered at least 98% of all genomes in Mock A, also recovered over 98% of all genomes in

228 Mock B except for the ssDNA genome NC\_001422, of which 56.5% was recovered in two contigs.  
229 The majority of assemblies exhibited  $147.9 \pm 0$  and  $297 \pm 1$  mismatches per 100kb for NC\_001330  
230 and NC\_001422 (high abundance ssDNA), respectively, identical values to those measured in Mock  
231 A. Velvet and MetaVelvet were exceptions with 184.2 and 860.2 for genome NC\_001422 and  
232 NC\_001330. A similar pattern of high values across a narrow range was also observed with the  
233 number of indels, with 49.3 to 32.9 present in all assemblies NC\_001330. Genome NC\_001422  
234 featured 18.57 indels across all SPAdes assemblies (all parameters) and 860.2 across both Velvet and  
235 Metavelvet assemblies. All other assemblers which successfully recovered this genome did not feature  
236 any indels (Supplementary Figure 1, Additional file 6).

### 237 *Q33*

238 Five assemblers failed to generate contigs which met alignment thresholds and were subsequently  
239 excluded from further analysis - namely ABySS (*k*-mer 63), ABySS (*k*-mer 127), SOAPdenovo2,  
240 Velvet and MetaVelvet. All remaining assemblers recovered over 90% of the spiked Q33 genome  
241 with the exception of MIRA (8.5%). Six assemblers recovered over 99% of the Q33 genome in a  
242 single contig - SPAdes (meta) 99.74%, MEGAHIT (99.6%), VICUNA (99.6%), Ray meta (99.6%),  
243 CLC (99.5%) and Geneious (99.1) (Fig. 3). However, only MEGAHIT assembled the Q33 genome  
244 with a contig equal in length to the genome itself. SPAdes (meta) and CLC generated assemblies  
245 shorter than the reference genome by 86 and 141 bases. VICUNA (723), Geneious (1765), and Ray  
246 Meta (9884) each generated assemblies longer than the reference genome. SPAdes (default) SPAdes  
247 (single cell), IDBA UD and SPAdes (single cell + careful) each assembled Q33 in 2, 3, 4, 5 and 5  
248 contigs, respectively. Ray Meta and VICUNA assemblies had the lowest number of mismatches and  
249 indels per 100kb, however Ray Meta exhibited the highest rate of misassemblies (2 relocations, 1  
250 inversion). All assemblers featured a minimum of one local misassembly with the exception of  
251 SPAdes (meta) did not feature any. The six best assemblies of the Q33 genome and the genome itself  
252 are syntenic (although occasionally on the reverse strand) and the start and end point were not  
253 conserved (Fig .3).

### 254 *Read depth analysis (Time and RAM)*

255 Assemblers were compared for practicality by measuring the time to reach completion and maximum  
256 RAM usage via four published healthy human gut viromes (Manrique, Bolduc et al. 2016) and various  
257 sequencing depths . It must be noted that all assembly tasks were allocated five threads, however  
258 specifying the number of threads did not change the number of threads used by certain programs.  
259 MetaVelvet was not included in this analysis as it failed to reach completion after running for seven  
260 days. CLC and Geneious were performed on a desktop computer and therefore excluded from time  
261 and RAM analysis. Run time is dependent upon the number of reads and this is largely linear in scale  
262 with more reads leading to an increased assembly time (Fig. 4a). MIRA and Vicuna (Fig. 4a insert)  
263 were the slowest with MIRA taking over 15 times longer than the other software to assemble 3.5  
264 million reads. SOAPdenovo2 had the shortest completion time followed by IBDA UD and Velvet.  
265 Most assemblers were consistent across samples (observed via error bars) with the exception of  
266 MIRA and Ray Meta. MIRA, Vicuna and Velvet (Fig. 4b insert) had the highest max RAM usage  
267 while the lowest was Ray Meta, IDBA UD and SPAdes (meta) (Fig. 4b). The majority of assemblers  
268 observed a linear scale pattern similar to that of run time.

#### 269 *Read depth analysis N50 and Longest contig length*

270 For both the N50 (Fig. 4c) and the longest contig length (Fig. 4d), there was a large amount of  
271 variation between samples for the majority of assemblers. The longest contig length showed a large  
272 increase at the final sequencing depth. Particular assemblers, namely SPAdes (default), SPAdes  
273 (meta), MEGAHIT and ABySS ( $k$ -mer 127), produced longer contigs as the sequence depth was  
274 increased.

#### 275 **Discussion**

276 Many bacterial metagenomic assembly comparisons have highlighted that the choice of assembler has  
277 a significant impact on downstream analysis and the accuracy of the reconstructed metagenome  
278 (Mavromatis, Ivanova et al. 2007, Lindgreen, Adair et al. 2016, Greenwald, Klitgord et al. 2017,  
279 Vollmers, Wiegand et al. 2017). We have found this also to be true for viral metagenomes, where  
280 accurate and complete assembly are of particular importance given the lack of viral representation in

281 reference databases. Virome studies depend heavily on the assembly step and possess many features  
282 which are challenging to successful assembly. In this study we compared the performance of those  
283 assemblers used to date in human viral metagenomics studies using datasets of known and unknown  
284 composition and varying complexity. These included a Q33 spiked virome, mock virome  
285 communities, a simulated virome and the “Healthy human gut phageome” (Manrique, Bolduc et al.  
286 2016). Each dataset provided unique attributes allowing for comparison of assembly performance on a  
287 number of levels. The combination of artificial and real viromes used in this study allows for the  
288 comparison of various aspects of assembly performance across a range of datasets rather than  
289 depending on simulated viromes alone, as is commonly carried out in assembly comparisons  
290 (Mavromatis, Ivanova et al. 2007, Fritz, Hofmann et al. 2018) .

291         The Simulated dataset featured 572 viral genomes at various relative abundances as published  
292 by Vázquez-Castellanos and colleagues (Vázquez-Castellanos, García-López et al. 2014). Fragmented  
293 assemblies of individual genomes within microbial communities hamper downstream analysis and  
294 limit the conclusions which can be drawn from metagenomic data such as taxonomic and functional  
295 profiles (Florea, Souvorov et al. 2011). Consequently, the percentage genome recovery and degree of  
296 fragmentation was assessed across each assembler, with SPAdes (default, meta and single cell) each  
297 performing well. VICUNA performed very poorly, recovering only four contigs with high numbers of  
298 mismatches and misassemblies, despite having performed well with other datasets and being designed  
299 to address challenges of heterogeneous viral populations (Yang, Charlebois et al. 2012). This failure  
300 may reflect the computational challenges relating to the format of the simulated reads, as benchmarks  
301 carried out within the VICUNA study itself only include actual sequencing reads (Yang, Charlebois et  
302 al. 2012). However, similar poor performance has been previously observed in virome assembly  
303 comparison using VICUNA and 454 reads (Vázquez-Castellanos, García-López et al. 2014). For  
304 those assemblers which could recover greater than 90% of the reference genome in a single contig,  
305 SPAdes (default) outperformed SPAdes (meta). This may be explained by a lack of strain variants in  
306 the dataset and the fact that SPAdes (meta) was optimised to combine strain variants of each species  
307 to form consensus sequences.

308           A subset of genomes were poorly recovered (<20% genome fraction) by nearly all  
309 assemblers. This observation indicates that there are challenging aspects of viral genomes and  
310 metagenomes which cannot be overcome with current assembly strategies. The strong positive  
311 correlations between the relative abundance and genome fraction suggest that a low abundance  
312 threshold applies to virome assembly, below which assemblies will consist of small fractions of the  
313 viral genome, and in most cases be highly fragmented. This detrimental impact of low coverage has  
314 been well established in previous assembly comparison studies (García-López, Vázquez-Castellanos  
315 et al. 2015, Roux, Emerson et al. 2017, Fritz, Hofmann et al. 2018). Highly abundant genomes also  
316 caused similar recovery and fragmentation issues across all assemblers, which is of particular  
317 importance due to the prevalence of extremely high abundance genomes in viral data (crAssphage,  
318 certain ssDNA viruses). As both abundance extremes are common in virome data, their impact must  
319 be considered when designing virome studies (i.e. sequencing depth). As relative abundance alone did  
320 not fully explain the variation in genome fraction recovered, the role of genomic repeats (a well-  
321 established assembly challenge (Acuña-Amador, Primot et al. 2018) was also investigated. However,  
322 genomic repeats could explain the variation in genome fraction recovered to a lesser degree than  
323 relative abundance, suggesting other factors contribute to poor genome recovery.

324           Compositional differences between final assemblies and viromes themselves must be taken  
325 into account when drawing conclusions about virome composition and setting parameters for  
326 downstream analysis. Challenges such as genomic content and strain variation are not currently  
327 addressed in human virome assembly strategies and impact the reconstruction of certain members of a  
328 virome. Hybrid sequencing, which uses both long and short reads to resolve genomic regions  
329 associated with poor assembly (Warwick-Dugdale, Solonenko et al. 2018) is a promising new  
330 technology which could address current virome assembly challenges. Extraction methods which may  
331 reduce the bias introduced by MDA steps include using Swift Biosciences 1S Plus kit (Roux,  
332 Solonenko et al. 2016) and/or increasing overall sequencing depth to improve coverage of lowly  
333 abundant viral genomes (in conjunction with an assembler which is less sensitive to high coverage  
334 sequences).

335 Performance of some assemblers in this study was hampered by high coverage datasets  
336 (namely overlap consensus assemblers). VICUNA assemblies exhibited the highest degree of  
337 fragmentation of all assemblers with Mock A, despite having resolved both high abundance ssDNA  
338 genomes of Mock B to a single contig. MIRA also exhibited a high degree of fragmentation with high  
339 abundance genomes in both simulated and mock datasets. However, MIRA was least affected by low  
340 abundance reads, recovering a greater genome fraction of low abundance genomes than other  
341 assemblers with fewer contigs. Assembly challenges of high coverage sequences in viromes may  
342 potentially be addressed by sub-setting reads similar to the assembly approach used by  
343 SLICEMBLER (Mirebrahim, Close et al. 2015).

344 Multi-assembler approaches such as the use of Geneious to generate consensus sequences from  
345 separate assemblers have been developed (Koren, Treangen et al. 2014, Schürch, Schipper et al. 2014,  
346 Deng, Naccache et al. 2015) but have not been included in human virome studies using short reads.  
347 MIRA assemblies of the Q33 genome and some low abundance genomes in the Simulated dataset  
348 were improved using Geneious, resolving greater genome fractions with fewer contigs (despite  
349 Geneious recovering a lower genome fraction of the Simulated dataset overall). It is possible that  
350 using these approaches could address issues facing each assembler, i.e. combine the assemblies of  
351 SPAdes (meta) which performs well across all 4 datasets but struggles to recover low abundant  
352 genomes, with MIRA assemblies which are less affected by low abundance but has difficulty  
353 resolving genomes of higher abundance. Comparison of multi-assembler approaches and  
354 combinations of various assemblers was not within the scope of this study, but should not be ruled out  
355 as a potential method of improving virome assembly in cases where composition could be assessed  
356 and obvious assembly challenges were known to be present.

357 Across all analysis methods in this study, SPAdes (meta) performed consistently well and  
358 would be our recommendation. It performed best in the Simulated data based on false positives, true  
359 positives and false negatives, best assembled the Q33 genome (recovery, fragmentation,  
360 misassemblies and genome size) and performed well with both mock communities in recovering all  
361 members accurately in one or two contigs. SPAdes (meta) RAM usage was low and did not increase



362 to the same degree as other assemblers with increasing sequencing depth. This recommendation is in  
363 agreement with previous comparisons (Vollmers, Wiegand et al. 2017) which also suggested using  
364 SPAdes (meta) due to its ability to accurately assemble members of bacterial metagenomes. SPAdes  
365 (meta) is less able to accurately reconstruct micro-diversity as it generates a consensus assembly of  
366 “strain–contigs” in a metagenome, which means it is better equipped to address the high mutation  
367 rates observed in virome data (Nurk, Meleshko et al. 2017). This recommendation is also concurrent  
368 with a previous study (Roux, Emerson et al. 2017) which found IDBA UD, MEGAHIT and SPAdes  
369 (meta) to perform equally well when assessed using 14 simulated viromes. However, we found that  
370 SPAdes (meta) outperformed IDBA UD and MEGAHIT in the Q33 spiked dataset, RAM usage in  
371 relation to increasing sequencing depth, and in its ability to recover members of the Simulated virome  
372 in a single contig. This recommendation contradicts two previous assembly comparisons which found  
373 CLC (Hesse, van Heusden et al. 2017) and Velvet (White, Wang et al. 2017) to be best suited to  
374 virome data. However, SPAdes (meta) was not included in either study. Though SPAdes (meta) was  
375 out performed by MIRA in the assembly of low abundance genomes in the Simulated dataset, MIRA  
376 has limited application to large datasets. MEGAHIT also performed well across all datasets  
377 performing well in relation to recovery, fragmentation and accuracy, but encountered some recovery  
378 issues in mock datasets and minor accuracy issues with the Q33 genome.

379         The higher levels of accuracy (low mismatch indel and misassembly counts) of assemblers  
380 which performed poorly in other metrics namely (velvet and ABySS ( $k$ -mer 63), highlights the trade-  
381 off between accuracy and contiguity observed in previous assembly studies (Gritsenko, Nijkamp et al.  
382 2012, Lin and Liao 2013). However, both IDBA-UD and MEGAHIT performed well for accuracy,  
383 genome recovery and fragmentation. These assemblers may be worth considering if strain level detail  
384 is of particular importance. The mock A and B datasets were used to assess the impact of  
385 amplification bias on assembly performance. All ssDNA assemblies featured an equal minimum  
386 number of mismatches across both Mock A and B. This may be caused by challenges in the genomes  
387 themselves hampering accurate assembly, but is more likely to reflect strain variation between

388 genome sequence featured in the original publication and the genome of the phage used in the  
389 community itself.

390 The Q33 spiked virome consisted of pooled reads from three healthy human faecal samples,  
391 each of which having been spiked with  $10^7$  PFU ml<sup>-1</sup> of lactococcal phage Q33 prior to virome  
392 extraction. This allowed for assembly comparison of one abundant member of a challenging viral  
393 community. Despite the high relative abundance of the Q33 genome, only 6 assemblers could recover  
394 over 90% of the genome in a single contig, of these SPAdes (meta) and MEGAHIT reconstructed the  
395 Q33 genome accurately without the introduction foreign or chimeric DNA. It was also noted that the  
396 genome synteny was conserved across these six assemblies. This may reflect circularization of the  
397 linear Q33 genome during DNA extraction as the presence of cos sites has been previously predicted  
398 (Mahony, Martel et al. 2013).

399 The longest contigs of each assembler were only detected at the highest sequencing depths  
400 and varied across assemblers, which may indicate that high coverage is necessary to recover the  
401 largest viral genomes in a community. However, it is also possible that these long contigs may reflect  
402 misassemblies and duplication events caused by read errors at high sequencing depths which must be  
403 considered when analysing high coverage data. At almost all sequencing depths Geneious, Vicuna,  
404 Ray Meta and ABySS (k-mer 127) exhibited the highest N50 values, despite performing poorly in  
405 other metrics. This further highlights the limitation of using N50 alone as a metric of metagenomic  
406 assembly (Vollmers, Wiegand et al. 2017).

407 A further important consideration when performing any metagenomic assembly is  
408 practicality; size of dataset, computational resources, bioinformatic resources, and how much hands-  
409 on time is required from the end user. Both CLC and Geneious are available as a GUI (albeit requiring  
410 a licence fee) which widens their audience to researchers with limited command-line experience (CLC  
411 can also be run using the windows command line). However, this limits their practicality for large  
412 scale virome studies as they are limited to the computational power of desktop computers and are not  
413 suited to the assembly of large numbers of samples. Despite the limitations of computational power,  
414 CLC performed well in all datasets in terms of genome recovery and fragmentation. Of the freely

415 available open source assemblers, MIRA and VICUNA are the least efficient in terms of RAM usage  
416 and assembly time, reflecting limitations of the overlap consensus approach to assembly. This limits  
417 their applicability to large virome datasets, and further increases the time required to carry out the  
418 Geneious assembly approach which requires the output of both assemblers. Despite the long runtime,  
419 VICUNA did not adhere to the number of cores specified, instead using all available cores. All other  
420 assemblers had a similar time requirements (with the exception of SOAPdenovo2 which performed  
421 poorly across all datasets). Of the assemblers which consistently performed well in terms of accuracy,  
422 genome fraction recovered and fragmentation, SPAdes (meta) was most efficient in terms of RAM  
423 usage, which did not increase to the same degree as other assemblers with increasing sequencing  
424 depth. MIRA stood out in terms of impracticality by generating by far the largest intermediate files of  
425 any assembler, requiring several gigabytes of storage space for intermediate files.

426         The combination of results from four datasets facilitates accurate comparison of assemblers as  
427 the limitations of each individual dataset vary. Application of Phi29 MDA to amplify virome DNA to  
428 sufficient quantities for sequencing can introduce significant bias and skew the original composition  
429 of the virome, making quantitative viromics difficult (Kim and Bae 2011, Roux, Solonenko et al.  
430 2016). As a result, it is likely that true diversity of viral metagenomes is not being accurately captured  
431 using current virome extraction methods. However, as these procedures move away from steps known  
432 to introduce bias, greater diversity will be observed. In this sense, the level of complexity of the Q33  
433 dataset, which pooled three independent human viromes, provides a useful testbed for metagenomic  
434 assemblers in future virome studies as extraction methods improve. Additionally, Q33 was not present  
435 in the viromes prior to spiking, assemblers were not challenged by the presence of native strain  
436 variations of Q33 genome. In this study, assemblers were compared without individual optimisation  
437 to the specific dataset. Feasibility dictates that, this “straight out of the box” approach to assembly is  
438 used by almost all metagenomic assembly comparisons. Additionally, as the true composition of  
439 metagenomes is unknown, any impact of parameter optimisation must be estimated from general  
440 assembly statistics such as N50 and longest contig which have been highlighted to be of limited  
441 usefulness (Aguirre de Cárcer, Angly et al. 2014, Vollmers, Wiegand et al. 2017).

## 442 **Conclusions**

443 Of all assembly programs used in human virome studies, SPAdes (meta) addressed the challenges of  
444 virome data most effectively. However, all assemblers have limitations and are hampered by aspects  
445 of virome data. Low read coverage and high genomic repeats lead to assemblies with low recovered  
446 genome fraction and a higher degree of fragmentation, with the assemblies themselves being less  
447 accurate. This pattern was seen across all assemblers used in this study.

448 As assembler choice has significant implications for virome composition and the conclusions  
449 which can be drawn from a dataset, assemblers which performed poorly in this study (i.e. low genome  
450 recovery or accuracy and high degree of fragmentation) highlight a potential untapped resource in the  
451 sequence data of previously conducted virome studies. It is highly likely that many viral sequences  
452 were poorly assembled and reanalysis using a more effective assembler may yield new insights.  
453 Design of future virome studies should carefully consider the impact of sequencing depth, as extremes  
454 in read coverage will prevent the assembly and detection of viral genomes at both high and low  
455 abundance.

456

## 457 **Methods**

458 Each assembler with the exception of Geneious and CLC was run as per manual with default  
459 parameters (unless stated) using a Lenovo x3650 M5 server with an intel Xeon processor E5-2690 v3  
460 and 512Gb RAM . Geneious assembly approach mirrored that used in (Manrique, Bolduc et al. 2016)  
461 by generating consensus sequences from the assemblies of both MIRA and Vicuna. CLC and  
462 Geneious were run on a 64-bit windows 10 computer with an i5-4690 CPU and 16 GB of RAM.

### 463 *Data sources*

464 Sequencing reads from mock communities A and B featured in (Roux, Solonenko et al. 2016),  
465 Simulated Virome dataset featured in (Hesse, van Heusden et al. 2017), reads used to compare the  
466 impact of sequencing depth on time and RAM usage featured in (Manrique, Bolduc et al. 2016) and

467 human viromes spiked with  $10^7$  PFU of Lactococcal phage Q33 (Mahony, Martel et al. 2013) and  
468 originated from (Shkoporov, Ryan et al. 2018) .

#### 469 *Read Pre-processing*

470 Raw read quality was assessed with FastQC v0.11.5 and sequencing adapters were removed with  
471 cutadapt v1.9.1 (Martin 2011) for the mock, Spiked and healthy gut virome data sets. Trimming and  
472 filtering was carried out with Trimmomatic v0.36 (Bolger, Lohse et al. 2014) using parameters  
473 specific to each dataset. A sliding window size of 4 with a minimum Phred score of 30 and a  
474 minimum length of 60bp was used with reads from both mock communities. The leading 15bp and  
475 trailing 60bp were removed from “Healthy human gut phageome” reads and a sliding window of 4bp  
476 with a minimum phred score of 20 was applied. The leading 10bp and trailing 100bp were removed  
477 from the Q33 spiked virome reads and a sliding window size of 4bp with a minimum Phred score of  
478 30. Filtered reads were through a minimum length filter of 60bp.

#### 479 *Analysis methods*

480 Quality filtered reads from the Q33 spiked dataset consisted of 3 individual viromes which were  
481 pooled and subsequently assembled. Contigs were aligned to the published Q33 using Blastn with an  
482 e-value cut-off of  $1e^{-20}$ . Top hit alignments to the Q33 genome with a minimum alignment length of  
483 800 bases and which shared 95% identity were included in further analysis using QUAST (v. 4.4)  
484 (Gurevich, Saveliev et al. 2013) with “--unique mapping” flag. Further comparison and visualisation  
485 of Q33 assemblies was carried out using Mauve (v. 20150226, build 10) (Darling, Mau et al. 2010).

486 Alignment and comparison of assemblies from mock and simulated data sets to reference  
487 genomes was carried using MetaQUAST (v. 4.4) (Mikheenko, Saveliev et al. 2015) with “--unique  
488 mapping” flag. Correlations were carried out using Spearman method and plots were generated using  
489 the package ggplot2 (v 3.0.0) package in R (v.3.4.3). These correlations were validated using a linear  
490 model in R base library. For data which was not normally distributed, log transformation was carried  
491 out.

492 Reads from the “healthy human gut phageome” were analysed to compare the overall  
493 assembler efficiency and the impact of sequencing depth. Reads were randomly subset in pairs (both  
494 the forward and reverse read of a pair were retained) to different depths using an in-house python  
495 script. Samples were subset in increments of 300,000 reads to their respective maximum depth (2.7,  
496 3.5, 3 and 3.3 million reads). The shell script *time* script, location `/usr/bin/time`, was utilised to  
497 measure the maximum RAM and length of time for each assembly to reach completion. All  
498 assemblers were run using 5 threads where possible with the exception of CLC, Geneious, Ray Meta,  
499 Velvet and Vicuna. Ray Meta and Velvet were run with 10, 1 thread(s) respectively. Ray Meta failed  
500 to run with 5 while Velvet ran with 1 core despite 5 being allocated. Vicuna was also allocated 5  
501 threads however used upwards of 20. MetaVelvet was run, but after 7 days had failed to reach  
502 completion and was therefore removed from the subsequent analysis of these metrics. Contig statistics  
503 and filtering (contigs greater than 1kb retained) were performed using the assembly-stats script from  
504 the Pathogen Informatics group at the Wellcome Sanger Institute ([https://github.com/sanger-](https://github.com/sanger-pathogens/assembly-stats)  
505 [pathogens/assembly-stats](https://github.com/sanger-pathogens/assembly-stats)).

## 506 **Figure Legends**

507 Figure 1: Relationship between percentage of each genome recovered (genome fraction), the number  
508 of contigs required for each combination of genome and assembler and the abundance and proportion  
509 of repeats for each genome. (A and B) Genomes are ordered by their average genome fraction across  
510 all assemblers from high to low along the x-axis. (A main) Relative abundance, normalized by  
511 genome length is plotted along y-axis with upper limit of 0.75% and colour of bars determined by  
512 proportion of repeat regions in each genome. Blue bars represent genomes with a high proportion of  
513 genomic repeats (4<sup>th</sup> quartile of all genomes), red represents all other genomes below this quartile. (A  
514 insert) Expanded view of (A) without an upper limit of y value. (B) Percentage genome recovered is  
515 plotted along the y axis. Points are coloured by assembler with shape of the point is denoting number  
516 of contigs generated by each assembler for each genome.

517 Figure 2: Number of contigs each assembler recovered to a minimum genome fraction of 90% in a  
518 single contig.

519 Figure 3: Mauve output of the Q33 reference genome (top) along with of the six assemblers which  
520 recovered >99% of the genome with a single contig. Assembly regions outside of locally collinear  
521 blocks which do not share homology to the reference genome are highlighted by a black outline.  
522 Reverse complement of assemblies in the opposite orientation to the reference were plotted for  
523 visualisation purposes (VICUNA, CLC, Geneious)

524 Figure 4: (A) Time, measured in seconds, for each assembly to reach completion successfully for each  
525 read subset, (B) the maximum RAM, measured in MB, used for each assembly for each read subset,  
526 (C) mean N50 length and (D) mean contig length for 4 samples for each assembly across the read  
527 subsets after filtering contigs less than 1000 bases. Points represent the mean time for the 4 samples  
528 while error bars are the standard error.

### 529 **Abbreviations/Glossary**

530 The following terms; Genome fraction, N50, number of contigs, misassemblies, local misassemblies,  
531 are defined by QUILT (Mikheenko, Saveliev et al. 2015)

532 Genome fraction “is the total number of aligned bases in the reference, divided by the genome size. A  
533 base in the reference genome is counted as aligned if there is at least one contig with at least one  
534 alignment to this base. Contigs from repeat regions may map to multiple places, and thus may be  
535 counted multiple times in this quantity.”

536 N50 “is the contig length such that using longer or equal length contigs produces half (50%) of the  
537 bases of the assembly. Usually there is no value that produces exactly 50%, so the technical definition  
538 is the maximum length x such that using contigs of length at least x accounts for at least 50% of the  
539 total assembly length.”

540 Number of contigs “is the total number of contigs in the assembly that have size greater than or equal  
541 to 0 bp.”

542 Misassemblies “is the number of positions in the assembled contigs where the left flanking sequence  
543 aligns over 1 kbp away from the right flanking sequence on the reference (relocation) or they overlap

544 on more than 1 kbp (relocation) or flanking sequences align on different strands (inversion) or  
545 different chromosomes (translocation).”

546 Local misassemblies “A local misassembly has two or more distinct alignments covering the  
547 breakpoint, the gap between left and right flanking sequences is less than 1 kbp and the left and right  
548 flanking sequences both are on the same strand of the same chromosome of the reference genome.”

#### 549 **Data sources**

550 Sequencing reads from mock communities A and B:

551 [http://datacommons.cyverse.org/browse/iplant/home/shared/iVirus/DNA\\_Viromes\\_library\\_comparison](http://datacommons.cyverse.org/browse/iplant/home/shared/iVirus/DNA_Viromes_library_comparison)  
552 [n](#) .

553 Simulated virome reads:

554 [https://figshare.com/articles/Simulated\\_virome\\_dataset\\_for\\_assembly\\_and\\_annotation\\_tests/515116](https://figshare.com/articles/Simulated_virome_dataset_for_assembly_and_annotation_tests/515116)  
555 [3](#) .

556 Reads used to compare the impact of sequencing depth on time and RAM usage from the NCBI SRA;

557 <http://www.ncbi.nlm.nih.gov/sra> under the accession numbers SAMN04415496 to SAMN04415499

558 Human viromes spiked with  $10^7$  PFU of Lactococcal phage Q33 phage

559 <http://www.ncbi.nlm.nih.gov/sra> under the accession numbers SRX3240741, SRX3240716,

560 SRX3240715

561

#### 562 **Declarations**

#### 563 **Ethics approval and consent to participate**

564 Not applicable

#### 565 **Consent for publication**

566 Not applicable



567 **Competing interests**

568 The authors declared that they have no competing interests.

569 **Funding**

570 This research was conducted with the financial support of Science Foundation Ireland (SFI)  
571 under Grant Number SFI/12/RC/2273 a Science Foundation Ireland's Spokes Programme  
572 which is co-funded under the European Regional Development Fund under Grant Number  
573 SFI/14/SP APC/B3032, and a research grant from Janssen Biotech, Inc.

574 **Authors' contributions**

575 TDSS, AGC, FJR, PR, and CH conceived and designed experiments. TDSS, AGC, FJR  
576 carried out bioinformatics analysis and drafted the manuscript. All authors approve and contributed to  
577 the final manuscript.

578 **Acknowledgements**

579 We thank the authors of all datasets used in this study for the availability of their data.

580

581 **References**

582

583

584

585

586 Acuña-Amador, L., A. Primot, E. Cadieu, A. Roulet and F. Barloy-Hubler (2018). "Genomic repeats,  
587 misassembly and reannotation: a case study with long-read resequencing of *Porphyromonas gingivalis*  
588 reference strains." *BMC genomics* **19**(1): 54.  
589 Aggarwala, V., G. Liang and F. D. Bushman (2017). "Viral communities of the human gut:  
590 metagenomic analysis of composition and dynamics." *Mobile DNA* **8**(1): 12.  
591 Aguirre de Cárcer, D., F. E. Angly and A. Alcamí (2014). "Evaluation of viral genome assembly and  
592 diversity estimation in deep metagenomes." *BMC Genomics* **15**(1): 989.  
593 Bankevich, A., S. Nurk, D. Antipov, A. A. Gurevich, M. Dvorkin, A. S. Kulikov, V. M. Lesin, S. I.  
594 Nikolenko, S. Pham and A. D. Prjibelski (2012). "SPAdes: a new genome assembly algorithm and its  
595 applications to single-cell sequencing." *Journal of computational biology* **19**(5): 455-477.

596 Boisvert, S., F. Raymond, É. Godzaridis, F. Laviolette and J. Corbeil (2012). "Ray Meta: scalable de  
597 novo metagenome assembly and profiling." *Genome biology* **13**(12): R122.

598 Bolger, A. M., M. Lohse and B. Usadel (2014). "Trimmomatic: a flexible trimmer for Illumina  
599 sequence data." *Bioinformatics* **30**(15): 2114-2120.

600 Breitbart, M. (2011). "Marine viruses: truth or dare."

601 Darling, A. E., B. Mau and N. T. Perna (2010). "progressiveMauve: multiple genome alignment with  
602 gene gain, loss and rearrangement." *PloS one* **5**(6): e11147.

603 Deng, X., S. N. Naccache, T. Ng, S. Federman, L. Li, C. Y. Chiu and E. L. Delwart (2015). "An  
604 ensemble strategy that significantly improves de novo assembly of microbial genomes from  
605 metagenomic next-generation sequencing data." *Nucleic acids research* **43**(7): e46-e46.

606 Dutilh, B. E., N. Cassman, K. McNair, S. E. Sanchez, G. G. Silva, L. Boling, J. J. Barr, D. R. Speth,  
607 V. Seguritan and R. K. Aziz (2014). "A highly abundant bacteriophage discovered in the unknown  
608 sequences of human faecal metagenomes." *Nature communications* **5**: ncomms5498.

609 Florea, L., A. Souvorov, T. S. Kalbfleisch and S. L. Salzberg (2011). "Genome assembly has a major  
610 impact on gene content: a comparison of annotation in two *Bos taurus* assemblies." *PLoS One* **6**(6):  
611 e21400.

612 Foulongne, V., V. Sauvage, C. Hebert, O. Dereure, J. Cheval, M. A. Gouilh, K. Pariente, M. Segondy,  
613 A. Burguière and J.-C. Manuguerra (2012). "Human skin microbiota: high diversity of DNA viruses  
614 identified on the human skin by high throughput sequencing." *PloS one* **7**(6): e38499.

615 Fritz, A., P. Hofmann, S. Majda, E. Dahms, J. Droege, J. Fiedler, T. R. Lesker, P. Belmann, M. Z.  
616 DeMaere and A. E. Darling (2018). "CAMISIM: Simulating metagenomes and microbial  
617 communities." *bioRxiv*: 300970.

618 García-López, R., J. F. Vázquez-Castellanos and A. Moya (2015). "Fragmentation and Coverage  
619 Variation in Viral Metagenome Assemblies, and Their Effect in Diversity Calculations." *Frontiers in*  
620 *Bioengineering and Biotechnology* **3**(141).

621 Greenwald, W. W., N. Klitgord, V. Seguritan, S. Yooseph, J. C. Venter, C. Garner, K. E. Nelson and  
622 W. Li (2017). "Utilization of defined microbial communities enables effective evaluation of meta-  
623 genomic assemblies." *BMC genomics* **18**(1): 296.

624 Gritsenko, A. A., J. F. Nijkamp, M. J. Reinders and D. d. Ridder (2012). "GRASS: a generic  
625 algorithm for scaffolding next-generation sequencing assemblies." *Bioinformatics* **28**(11): 1429-1437.

626 Guo, L., X. Hua, W. Zhang, S. Yang, Q. Shen, H. Hu, J. Li, Z. Liu, X. Wang and H. Wang (2017).  
627 "Viral metagenomics analysis of feces from coronary heart disease patients reveals the genetic  
628 diversity of the Microviridae." *Virologica Sinica* **32**(2): 130-138.

629 Gurevich, A., V. Saveliev, N. Vyahhi and G. Tesler (2013). "QUAST: quality assessment tool for  
630 genome assemblies." *Bioinformatics* **29**(8): 1072-1075.

631 Hannigan, G. D., J. S. Meisel, A. S. Tyldsley, Q. Zheng, B. P. Hodkinson, A. J. SanMiguel, S. Minot,  
632 F. D. Bushman and E. A. Grice (2015). "The human skin double-stranded DNA virome:  
633 topographical and temporal diversity, genetic enrichment, and dynamic associations with the host  
634 microbiome." *MBio* **6**(5): e01578-01515.

635 Hesse, U., P. van Heusden, B. M. Kirby, I. Olonade, L. J. van Zyl and M. Trindade (2017). "Virome  
636 Assembly and Annotation: A Surprise in the Namib Desert." *Frontiers in Microbiology* **8**(13).

637 Hurwitz, B. L. and M. B. Sullivan (2013). "The Pacific Ocean Virome (POV): a marine viral  
638 metagenomic dataset and associated protein clusters for quantitative viral ecology." *PloS one* **8**(2):  
639 e57355.

640 Kearse, M., R. Moir, A. Wilson, S. Stones-Havas, M. Cheung, S. Sturrock, S. Buxton, A. Cooper, S.  
641 Markowitz and C. Duran (2012). "Geneious Basic: an integrated and extendable desktop software  
642 platform for the organization and analysis of sequence data." *Bioinformatics* **28**(12): 1647-1649.

643 Kim, K.-H. and J.-W. Bae (2011). "Amplification methods bias metagenomic libraries of uncultured  
644 single-stranded and double-stranded DNA viruses." *Applied and environmental microbiology*: AEM.  
645 00289-00211.

646 Koren, S., T. J. Treangen, C. M. Hill, M. Pop and A. M. Phillippy (2014). "Automated ensemble  
647 assembly and validation of microbial genomes." *BMC bioinformatics* **15**(1): 126.

648 Li, D., R. Luo, C.-M. Liu, C.-M. Leung, H.-F. Ting, K. Sadakane, H. Yamashita and T.-W. Lam  
649 (2016). "MEGAHIT v1.0: A fast and scalable metagenome assembler driven by advanced  
650 methodologies and community practices." *Methods* **102**: 3-11.

- 651 Lim, E. S., Y. Zhou, G. Zhao, I. K. Bauer, L. Droit, I. M. Ndao, B. B. Warner, P. I. Tarr, D. Wang and  
652 L. R. Holtz (2015). "Early life dynamics of the human gut virome and bacterial microbiome in  
653 infants." *Nature medicine* **21**(10): 1228.
- 654 Lin, S.-H. and Y.-C. Liao (2013). "CISA: contig integrator for sequence assembly of bacterial  
655 genomes." *PloS one* **8**(3): e60843.
- 656 Lindgreen, S., K. L. Adair and P. P. Gardner (2016). "An evaluation of the accuracy and speed of  
657 metagenome analysis tools." *Scientific reports* **6**: 19233.
- 658 Luo, R., B. Liu, Y. Xie, Z. Li, W. Huang, J. Yuan, G. He, Y. Chen, Q. Pan and Y. Liu (2012).  
659 "SOAPdenovo2: an empirically improved memory-efficient short-read de novo assembler."  
660 *Gigascience* **1**(1): 18.
- 661 Mahony, J., B. Martel, D. M. Tremblay, H. Neve, K. J. Heller, S. Moineau and D. van Sinderen  
662 (2013). "Identification of a new P335 subgroup through molecular analysis of lactococcal phages Q33  
663 and BM13." *Applied and environmental microbiology* **79**(14): 4401-4409.
- 664 Manrique, P., B. Bolduc, S. T. Walk, J. van der Oost, W. M. de Vos and M. J. Young (2016).  
665 "Healthy human gut phageome." *Proceedings of the National Academy of Sciences* **113**(37): 10400-  
666 10405.
- 667 Martin, M. (2011). "Cutadapt removes adapter sequences from high-throughput sequencing reads."  
668 *EMBnet. journal* **17**(1): pp. 10-12.
- 669 Mavromatis, K., N. Ivanova, K. Barry, H. Shapiro, E. Goltsman, A. C. McHardy, I. Rigoutsos, A.  
670 Salamov, F. Korzeniewski and M. Land (2007). "Use of simulated data sets to evaluate the fidelity of  
671 metagenomic processing methods." *Nature methods* **4**(6): 495.
- 672 McCann, A., F. J. Ryan, S. R. Stockdale, M. Dalmasso, T. Blake, C. A. Ryan, C. Stanton, S. Mills, P.  
673 R. Ross and C. Hill (2018). "Viromes of one year old infants reveal the impact of birth mode on  
674 microbiome diversity." *PeerJ* **6**: e4694.
- 675 Mikheenko, A., V. Saveliev and A. Gurevich (2015). "MetaQUAST: evaluation of metagenome  
676 assemblies." *Bioinformatics* **32**(7): 1088-1090.
- 677 Minot, S., S. Grunberg, G. D. Wu, J. D. Lewis and F. D. Bushman (2012). "Hypervariable loci in the  
678 human gut virome." *Proceedings of the National Academy of Sciences* **109**(10): 3962-3966.
- 679 Mirebrahim, H., T. J. Close and S. Lonardi (2015). "De novo meta-assembly of ultra-deep sequencing  
680 data." *Bioinformatics* **31**(12): i9-i16.
- 681 Namiki, T., T. Hachiya, H. Tanaka and Y. Sakakibara (2012). "MetaVelvet: an extension of Velvet  
682 assembler to de novo metagenome assembly from short sequence reads." *Nucleic acids research*  
683 **40**(20): e155-e155.
- 684 Norman, J. M., S. A. Handley, M. T. Baldrige, L. Droit, C. Y. Liu, B. C. Keller, A. Kambal, C. L.  
685 Monaco, G. Zhao and P. Fleshner (2015). "Disease-specific alterations in the enteric virome in  
686 inflammatory bowel disease." *Cell* **160**(3): 447-460.
- 687 Nurk, S., D. Meleshko, A. Korobeynikov and P. A. Pevzner (2017). "metaSPAdes: a new versatile  
688 metagenomic assembler." *Genome research*: gr. 213959.213116.
- 689 Olson, N. D., T. J. Treangen, C. M. Hill, V. Cepeda-Espinoza, J. Ghurye, S. Koren and M. Pop  
690 (2017). "Metagenomic assembly through the lens of validation: recent advances in assessing and  
691 improving the quality of genomes assembled from metagenomes." *Briefings in bioinformatics*.
- 692 Paul, J. H. (2008). "Prophages in marine bacteria: dangerous molecular time bombs or the key to  
693 survival in the seas?" *The ISME journal* **2**(6): 579.
- 694 Peng, Y., H. C. Leung, S.-M. Yiu and F. Y. Chin (2012). "IDBA-UD: a de novo assembler for single-  
695 cell and metagenomic sequencing data with highly uneven depth." *Bioinformatics* **28**(11): 1420-1428.
- 696 Roux, S., J. B. Emerson, E. A. Elie-Fadrosh and M. B. Sullivan (2017). "Benchmarking viromics: an  
697 in silico evaluation of metagenome-enabled estimates of viral community composition and diversity."  
698 *PeerJ* **5**: e3817.
- 699 Roux, S., S. J. Hallam, T. Woyke and M. B. Sullivan (2015). "Viral dark matter and virus-host  
700 interactions resolved from publicly available microbial genomes." *Elife* **4**: e08490.
- 701 Roux, S., N. E. Solonenko, V. T. Dang, B. T. Poulos, S. M. Schwenck, D. B. Goldsmith, M. L.  
702 Coleman, M. Breitbart and M. B. Sullivan (2016). "Towards quantitative viromics for both double-  
703 stranded and single-stranded DNA viruses." *PeerJ* **4**: e2777.

704 Schürch, A. C., D. Schipper, M. A. Bijl, J. Dau, K. B. Beckmen, C. M. Schapendonk, V. S. Raj, A. D.  
705 Osterhaus, B. L. Haagmans and M. Tryland (2014). "Metagenomic survey for viruses in Western  
706 Arctic caribou, Alaska, through iterative assembly of taxonomic units." *PLoS One* **9**(8): e105227.  
707 Sczyrba, A., P. Hofmann, P. Belmann, D. Koslicki, S. Janssen, J. Dröge, I. Gregor, S. Majda, J.  
708 Fiedler and E. Dahms (2017). "Critical assessment of metagenome interpretation—a benchmark of  
709 metagenomics software." *Nature methods* **14**(11): 1063.  
710 Shkoporov, A. N., F. J. Ryan, L. A. Draper, A. Forde, S. R. Stockdale, K. M. Daly, S. A. McDonnell,  
711 J. A. Nolan, T. D. Sutton and M. Dalmasso (2018). "Reproducible protocols for metagenomic analysis  
712 of human faecal phageomes." *Microbiome* **6**(1): 68.  
713 Simpson, J. T., K. Wong, S. D. Jackman, J. E. Schein, S. J. Jones and I. Birol (2009). "ABYSS: a  
714 parallel assembler for short read sequence data." *Genome research*: gr. 089532.089108.  
715 Smits, S. L., R. Bodewes, A. Ruiz-Gonzalez, W. Baumgärtner, M. P. Koopmans, A. D. Osterhaus and  
716 A. C. Schürch (2014). "Assembly of viral genomes from metagenomes." *Frontiers in microbiology* **5**:  
717 714.  
718 Solden, L., K. Lloyd and K. Wrighton (2016). "The bright side of microbial dark matter: lessons  
719 learned from the uncultivated majority." *Current opinion in microbiology* **31**: 217-226.  
720 Vázquez-Castellanos, J. F., R. García-López, V. Pérez-Brocal, M. Pignatelli and A. Moya (2014).  
721 "Comparison of different assembly and annotation tools on analysis of simulated viral metagenomic  
722 communities in the gut." *BMC genomics* **15**(1): 37.  
723 Vollmers, J., S. Wiegand and A.-K. Kaster (2017). "Comparing and evaluating metagenome assembly  
724 tools from a microbiologist's perspective-Not only size matters!" *PloS one* **12**(1): e0169662.  
725 Warwick-Dugdale, J., N. Solonenko, K. Moore, L. Chittick, A. C. Gregory, M. J. Allen, M. B.  
726 Sullivan and B. Temperton (2018). "Long-read metagenomics reveals cryptic and abundant marine  
727 viruses." *bioRxiv*.  
728 Yang, X., P. Charlebois, S. Gnerre, M. G. Coole, N. J. Lennon, J. Z. Levin, J. Qu, E. M. Ryan, M. C.  
729 Zody and M. R. Henn (2012). "De novo assembly of highly diverse viral populations." *BMC*  
730 *genomics* **13**(1): 475.  
731 Zerbino, D. and E. Birney (2008). "Velvet: algorithms for de novo short read assembly using de  
732 Bruijn graphs." *Genome research*: gr. 074492.074107.

733

734

### 735 **Additional files**

736 Additional file 1. (html) Simulated Virome MetaQUAST output.

737 Additional file 2. (html) Mock virome A MetaQUAST output.

738 Additional file 3. (html) Mock virome B MetaQUAST output.

739 Additional file 4. (html) Q33 spiked virome QUAST output.

740 Additional file 5. (xls)

741 S. Table 1: Spearman correlation values from the relationships of indel, mismatch and misassembly  
742 counts, recovered genome fraction, abundance and total proportion of genomic repeats within the  
743 Simulated virome. \*GF – Recovered genome fraction

744 Additional file 5. (xls)

745 Supplementary Table 2: Linear modelling correlation values comparing recovered genome fraction,  
746 total proportion of genomic repeats and abundance for the Simulated virome.

747 Additional file 5. (xls)

748 Supplementary Table 3: Spearman correlation values from the relationships of inverted, tandem,  
749 palindromic and total repeats, abundance and the number of contigs generated by each assembler for  
750 the Simulated virome.

751 Additional file 5. (xls)

752 Supplementary Table 4: (A) Ranking table comparing recovered genome fraction and contig numbers  
753 for assemblers which recovered at least 50% of the total genome fraction. (B) Ranking table of indel,  
754 mismatch and misassembly counts per 100kb, normalised to the number of genomes recovered to at  
755 least 50%.

756 Additional file 5. (xls)

757 Supplementary Table 5: Number of aligned and unaligned contigs generated by each assembler for  
758 Mock Community A.

759 Additional file 5. (xls)

760 Supplementary Table 6: Number of aligned and unaligned contigs generated by each assembler for  
761 Mock Community B.

762 Additional file 6. Supplementary Figure 1. Analysis of recovered genome fraction and indel/mismatch  
763 counts for Mock communities A and B. Triangles represent N/A values for mismatches and indels  
764 caused by assembly failures.

765

766

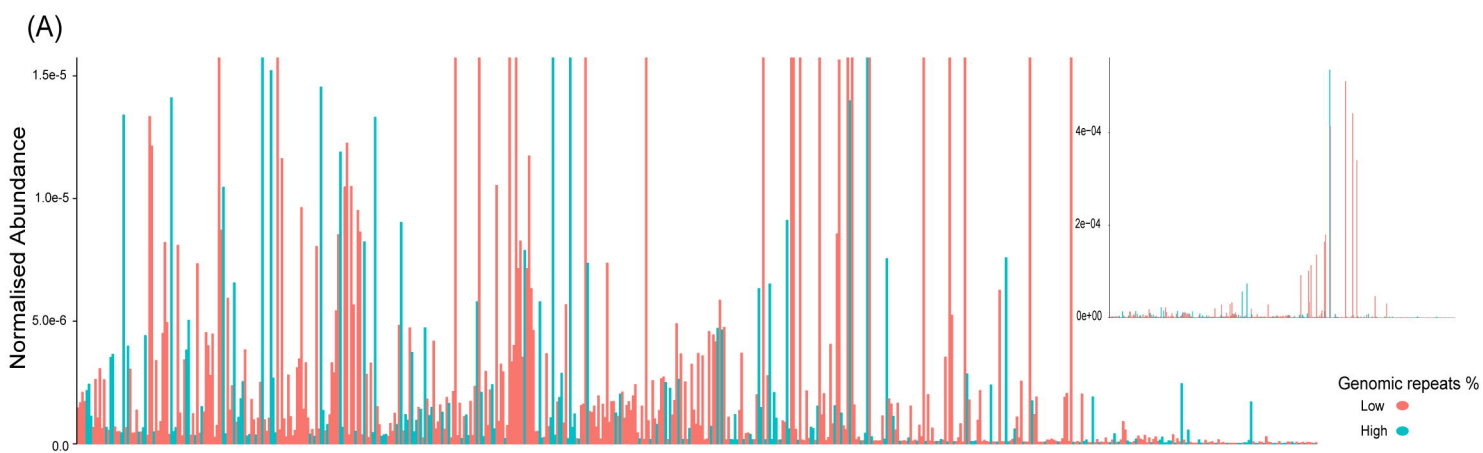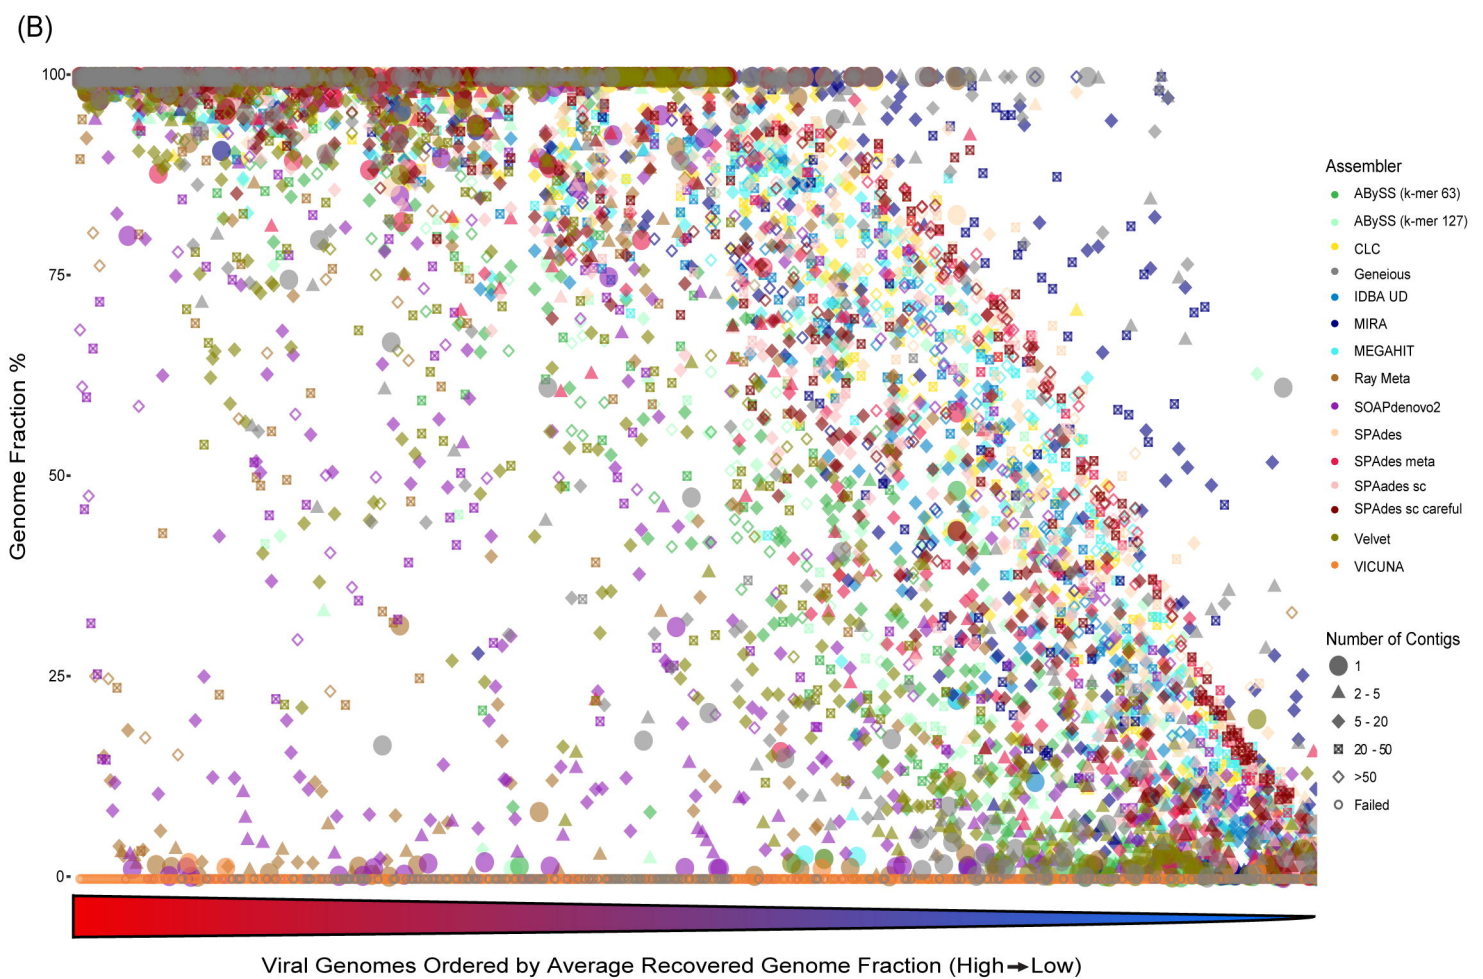

90% Genome coverage with a single contig

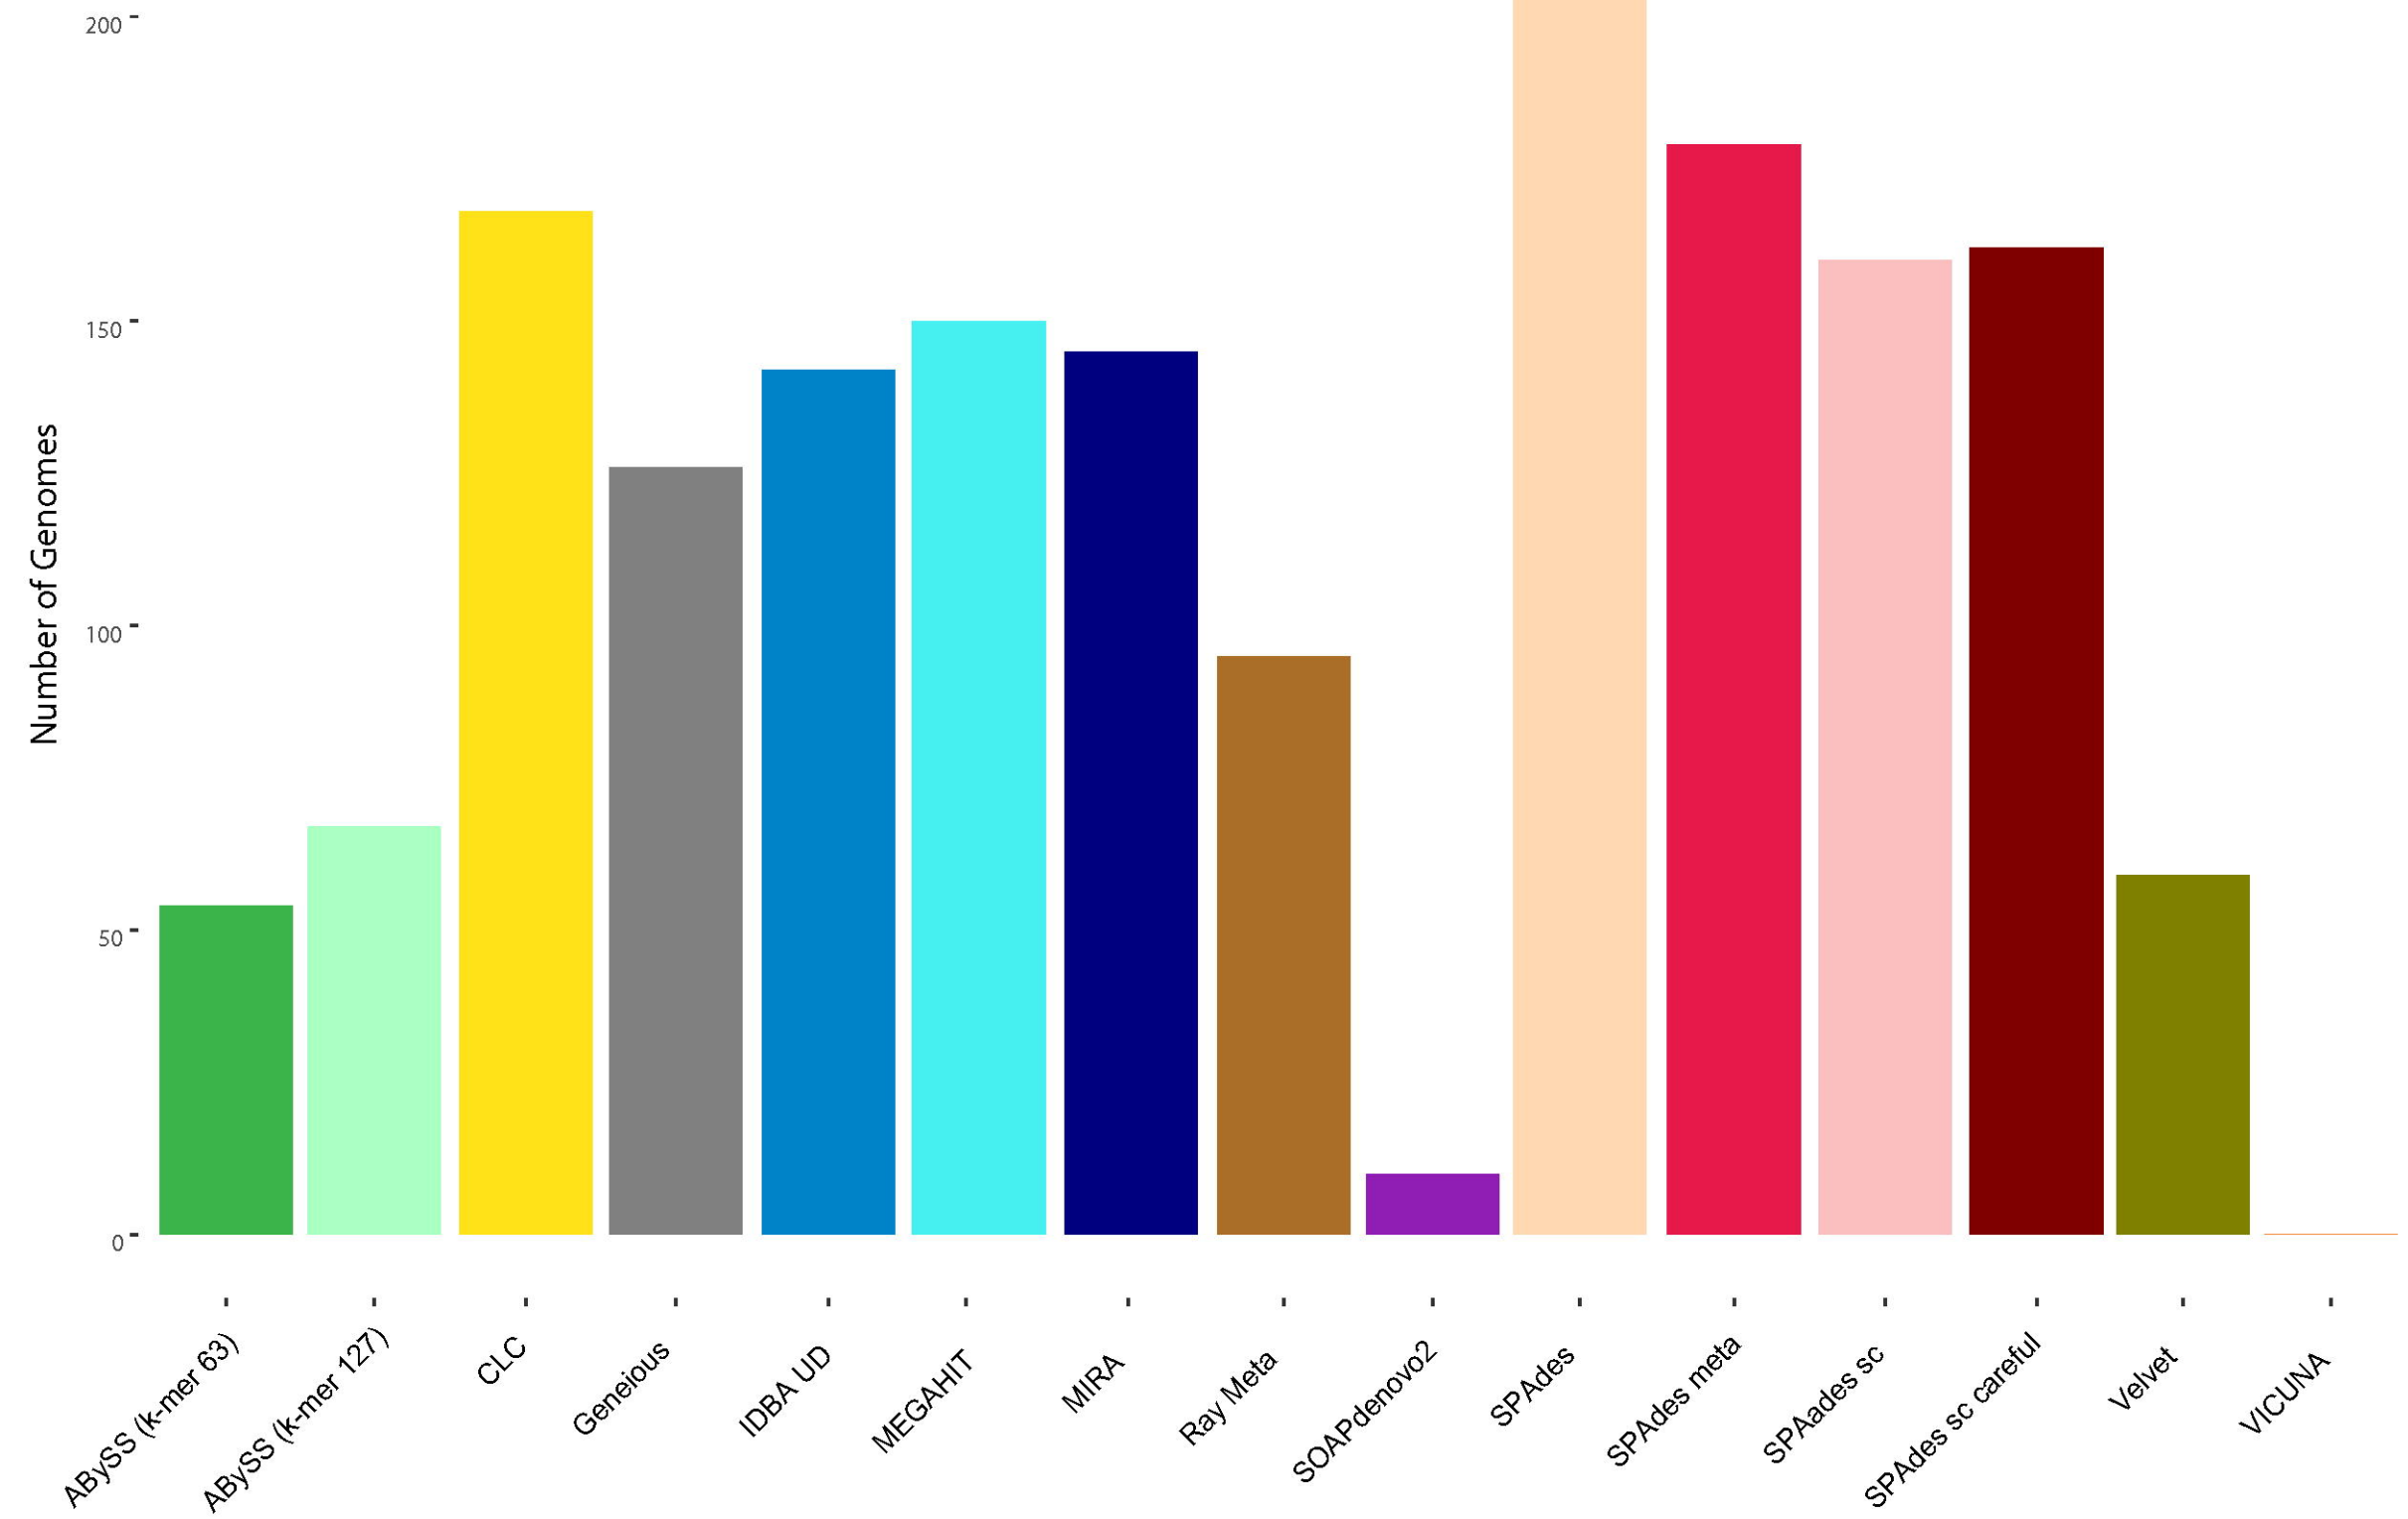

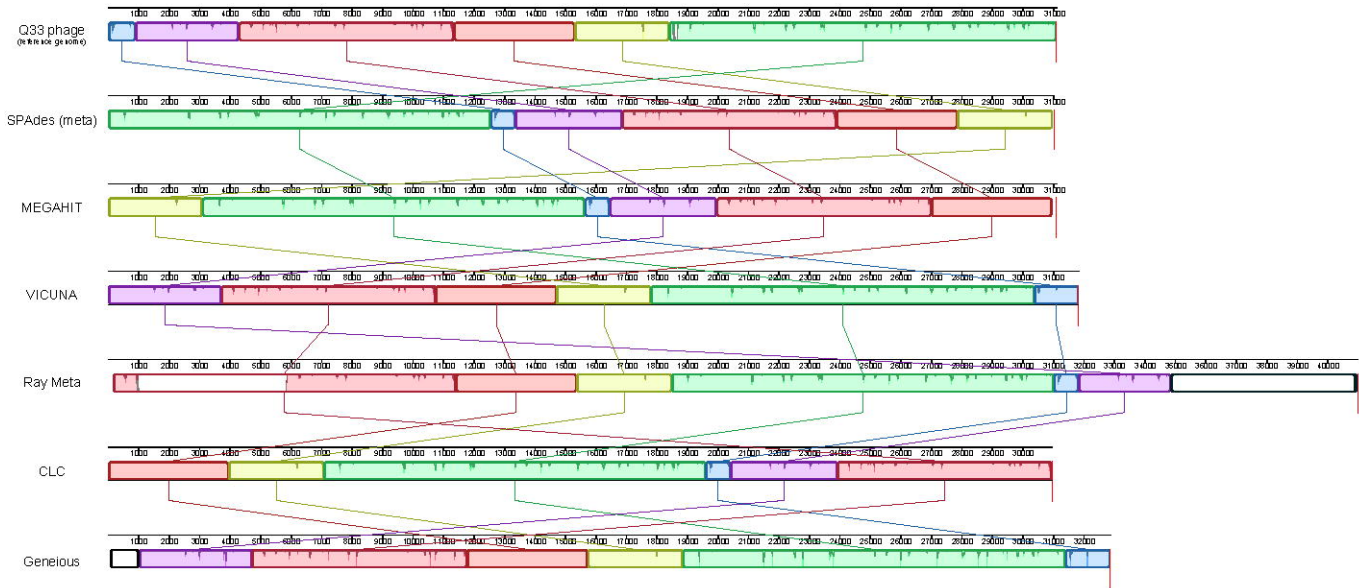



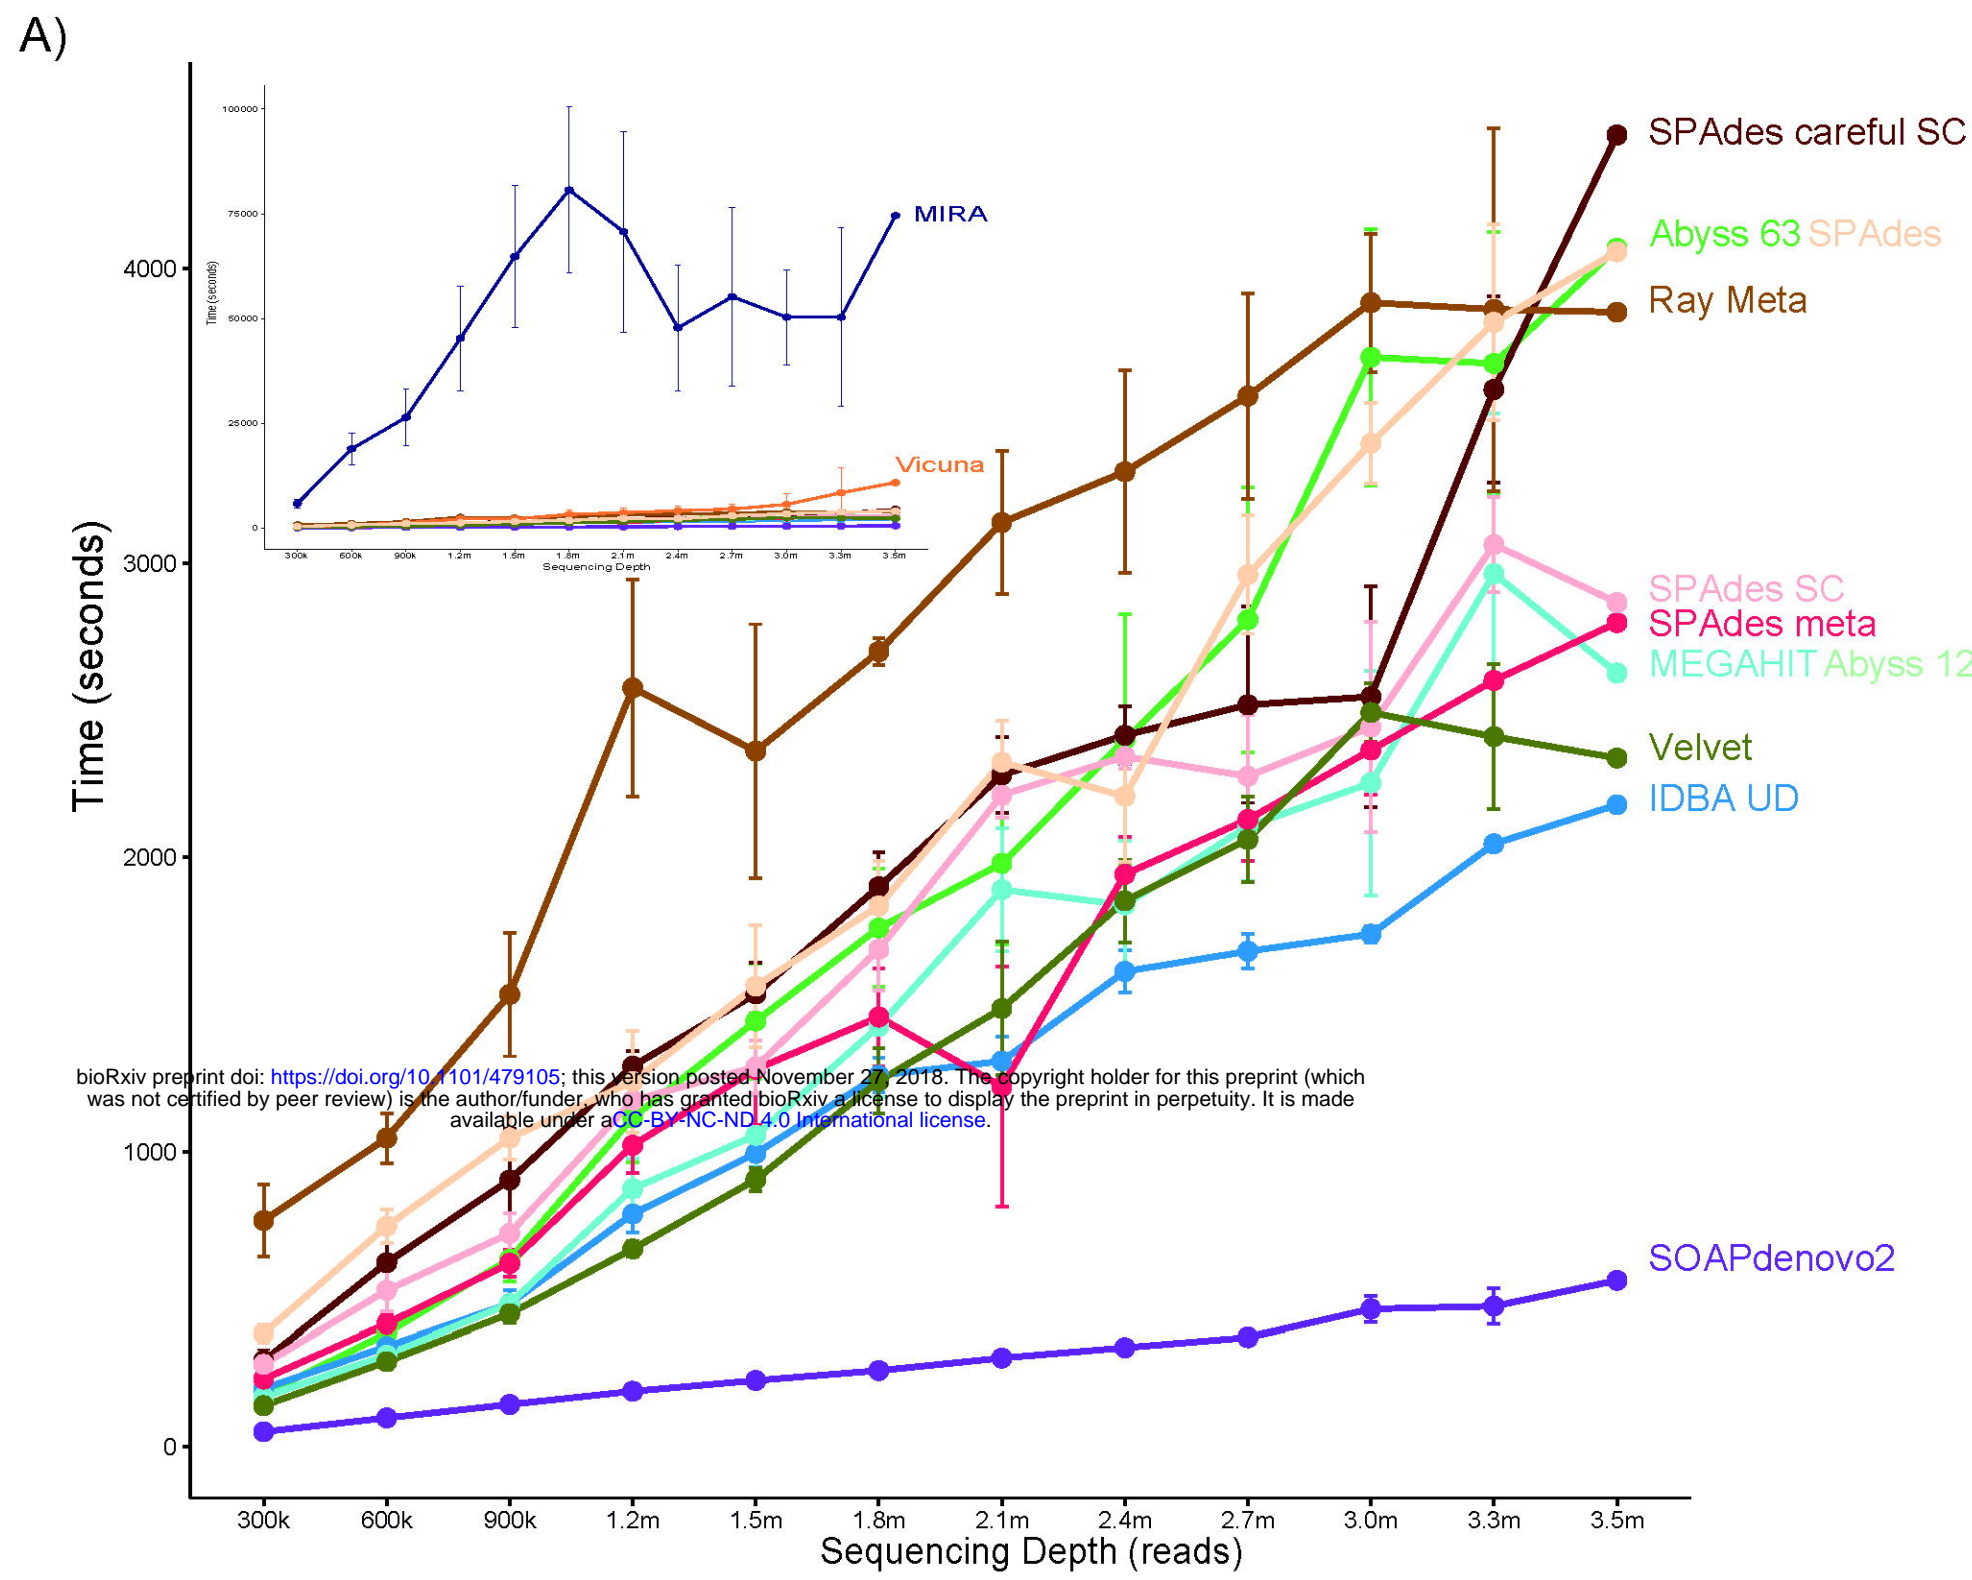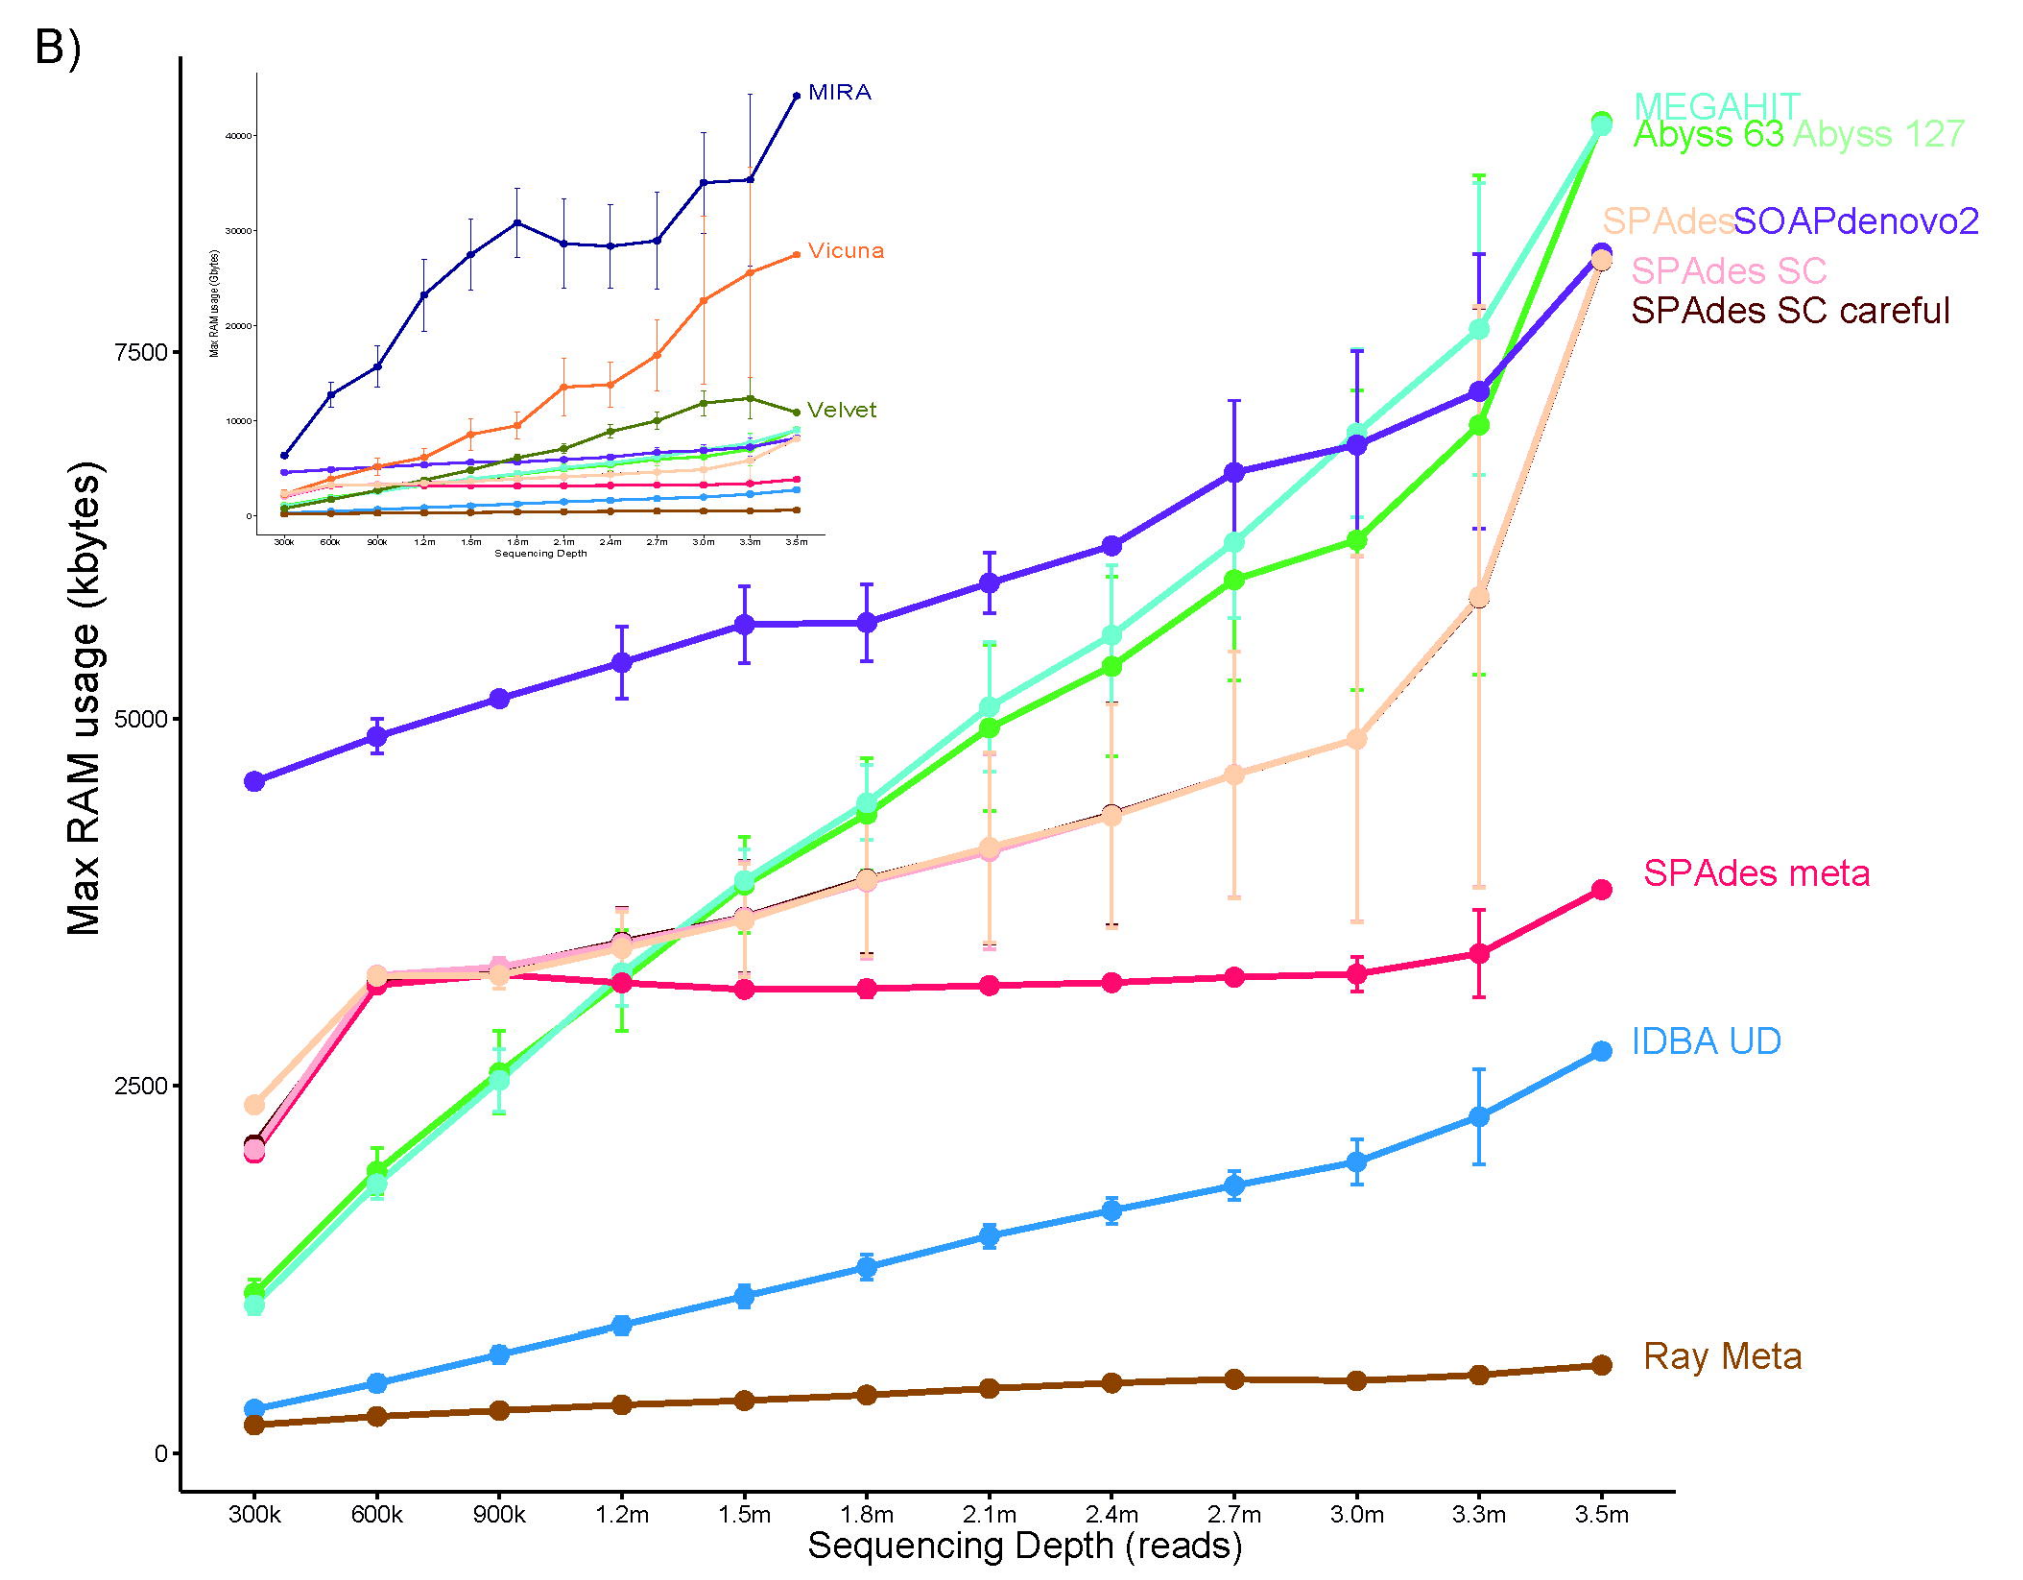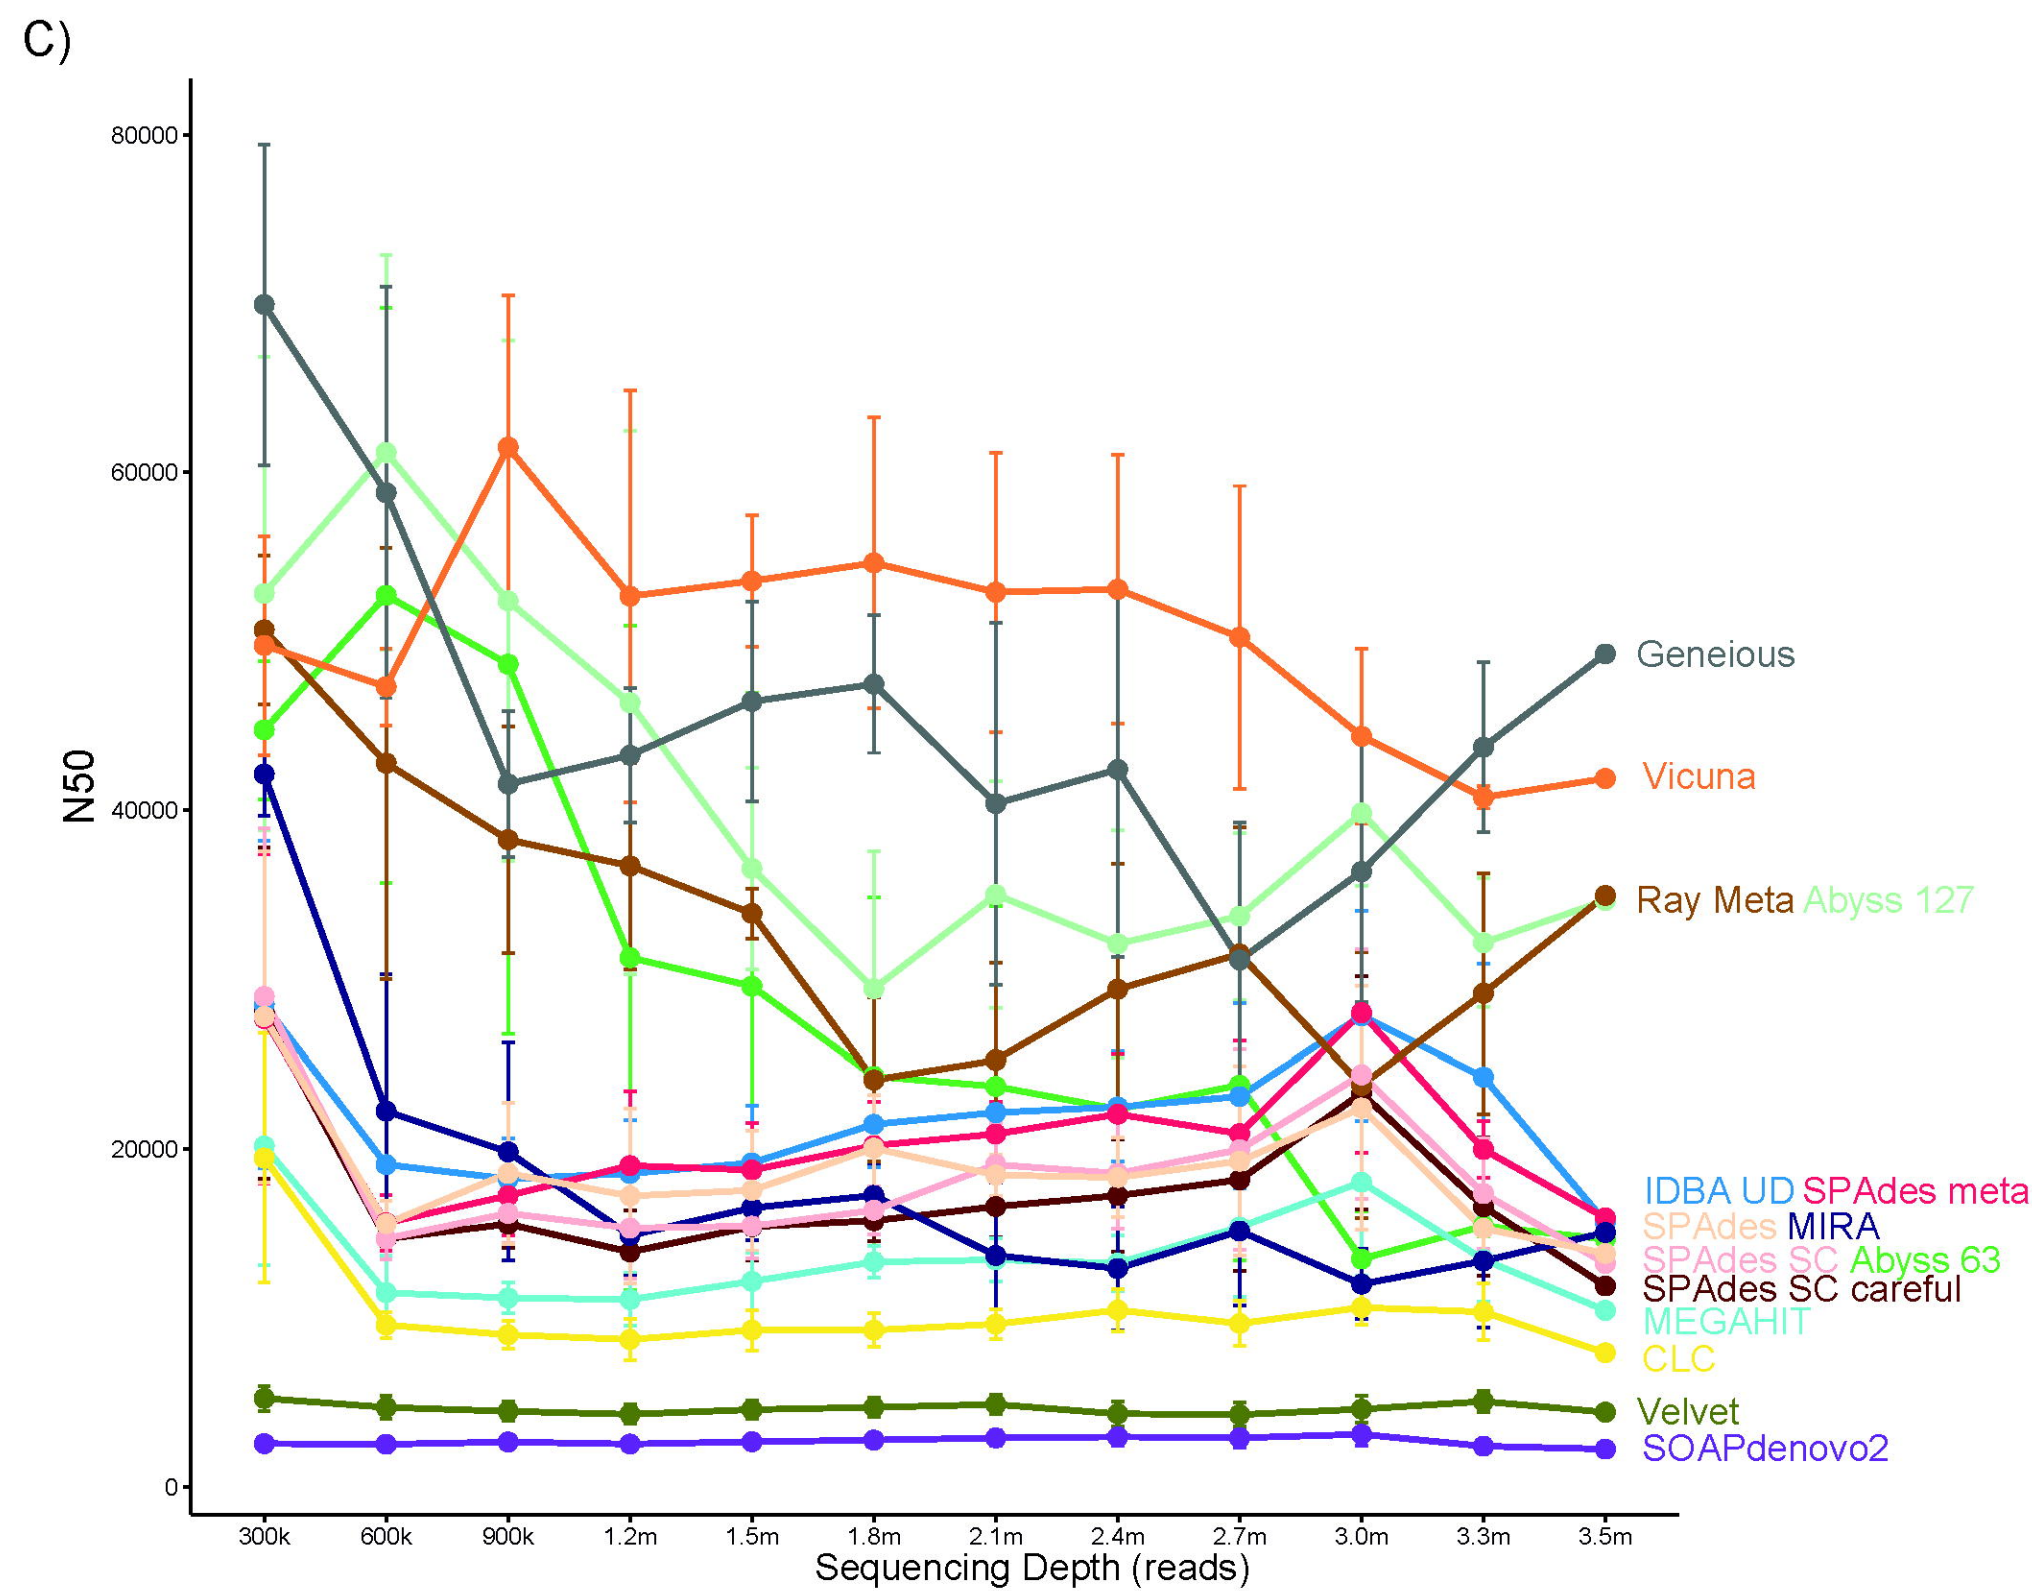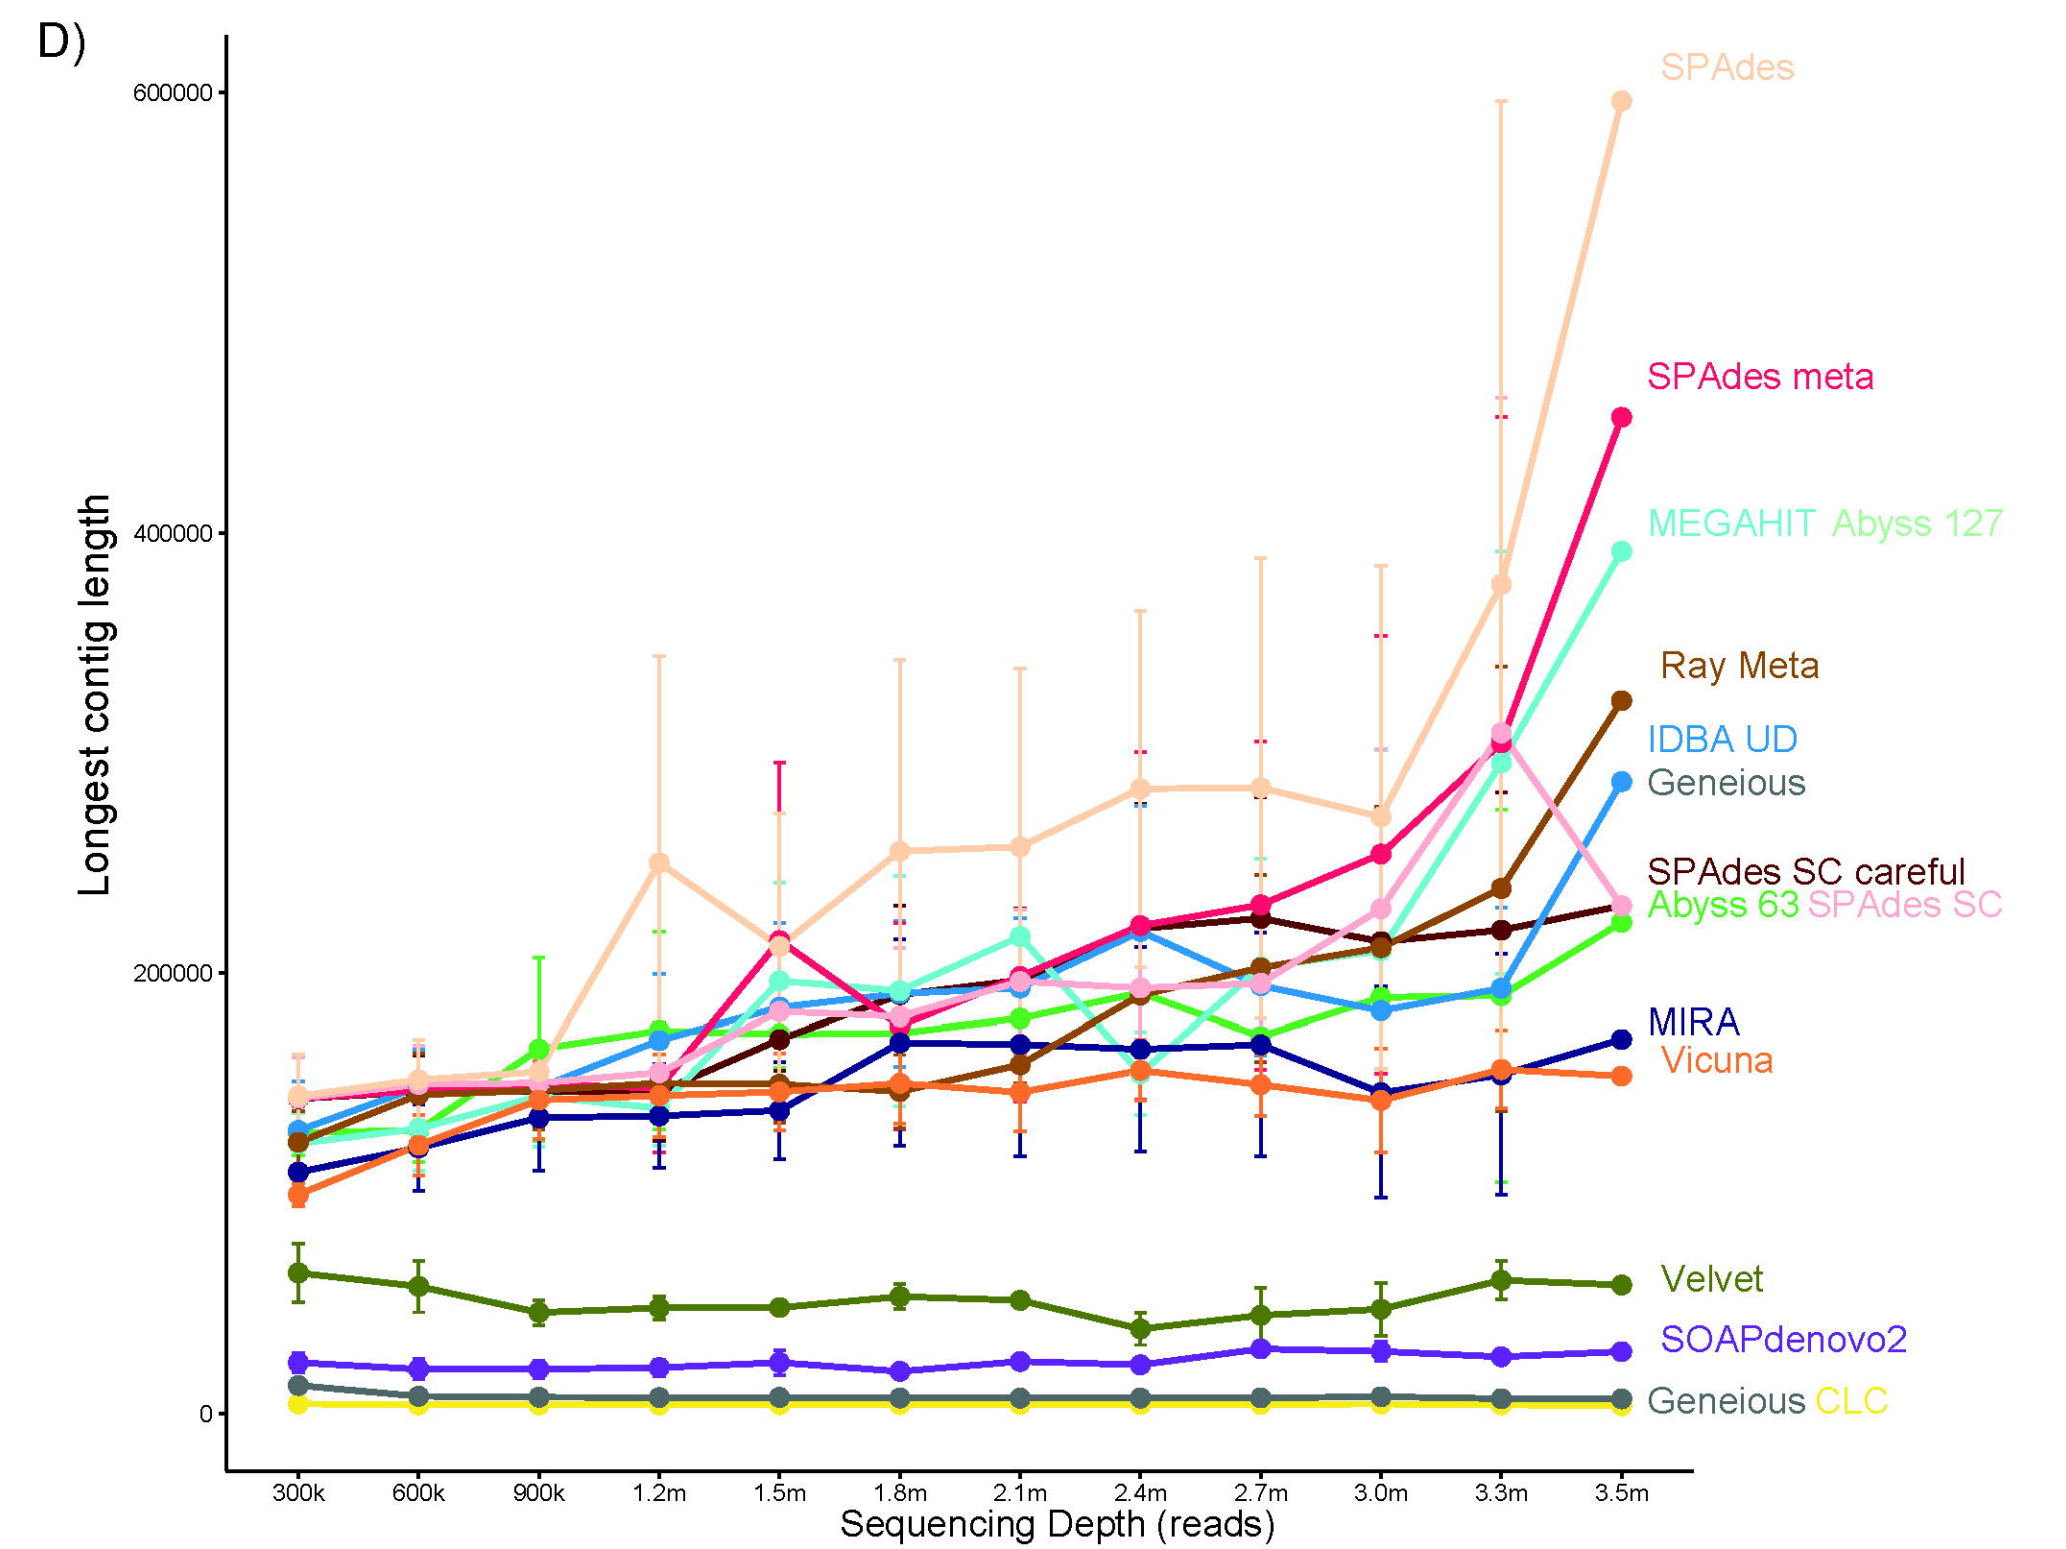

Source: http://biorxiv.org/content/10.1101/479105v1.full.pdf
